# When Abstract Becomes Concrete: Naturalistic Encoding of Concepts in the Brain

Viktor Kewenig<sup>1,2</sup>, Gabriella Vigliocco<sup>1</sup>, & Jeremy I Skipper<sup>1</sup>

<sup>1</sup>Experimental Psychology, University College London, 26 Bedford Way, WC1H 0DS London

<sup>2</sup>Corresponding Author: viktor.kewenig18@ucl.ac.uk; (+44)7821130004

## Abstract

Language is acquired and processed in complex and dynamic naturalistic contexts, involving simultaneous processing of connected speech, faces, bodies, objects, etc.. How words and their associated concepts are encoded in the brain during real-world processing is still unknown. Here, the representational structure of concrete and abstract concepts was investigated during movie watching to address the extent to which brain responses dynamically change depending on contextual information. First, across contexts, concrete and abstract concepts are shown to encode different experience-based information in separable sets of brain regions. However, these differences are reduced when multimodal context is considered. Specifically, the response profile of abstract words becomes more concrete-like when these are processed in visual scenes highly related to their meaning. Conversely, when the visual context is unrelated to a given concrete word, the activation pattern resembles more that of abstract conceptual processing. These results suggest that while concepts generally encode habitual experiences, the underlying neurobiological organisation is not fixed but depends dynamically on available contextual information.

Keywords: concept representation | context | embodied cognition | naturalistic neuroimaging | semantic memory

Humans acquire, and process language in situated multimodal contexts, through dynamic interactions with their environment. For example, children may learn what the word 'tiger' means primarily via sensory-motor experience: they see one on TV, or they are told that a tiger looks like a big cat. Conversely, the experience required for understanding the more abstract concept 'good' will likely include an evaluation of the rational and emotional motives underscoring intentional actions. Consequently, while more concrete concepts have external physical references (they refer to objects or actions that are easily perceived in the world) (Wiemer-Hastings, 2010), more abstract concepts do not necessarily have such reference (they generally refer more to cultural and societal constructs or peoples' inner states of mind) (Villani, 2019). Is this difference reflected in concrete and abstract representations in the brain during naturalistic processing? And are these static or can they change as a function of the multimodal contexts in which processing occurs?

Most studies of concrete and abstract processing are not naturalistic in that they present words or sentences isolated from the rich contexts in which we usually process them. Collectively, these studies suggest that concrete and abstract concepts engage separate brain regions involved in processing different types of information. (Bedny & Thompson-Schill, 2006; Binder et al., 2009; Sabsevitz et al., 2005; Wang et al., 2010; Vigliocco et al., 2014). Concrete words engage regions involved in experiential processing (Barsalou et al., 2003; Pulvermuller & Fadiga, 2010). For example, motor related cortices activate during the processing of action verbs like 'throw' (Hauk & Pulvermüller, 2004), or action related nouns like 'hammer' (Vigliocco et al., 2006; Kiefer & Pulvermüller, 2012), auditory cortices for sound-related words like 'telephone' (Goldberg et al., 2006; Kiefer et al., 2008), and visual cortices for colour-related words like 'yellow' (Hsu et al., 2011; Simmons et al., 2007). These results are consistent with the view that we learn and neurobiologically encode concrete concepts in terms of the sensory and motor experiences associated with their referents.

In contrast, some studies of abstract concepts have found greater activation in brain regions associated with general linguistic processing (J. R. Binder, 2005; Mellet, 1998; Noppeney et al., 2004; Sabsevitz et al., 2005). These findings suggest that abstract concepts are learnt by understanding their role in linguistic context, including semantic relationships with other words (e.g. 'democracy' is understood through its relationships to words like 'people', 'parliament', 'politics', etc., e.g. Recchia & Jones, 2012). However, neurobiological data also support the view that subcategories of abstract concepts retain sensorimotor information (Harpaintner et al., 2022, 2020 & 2018; Fernandino et al., 2022) as well as social information (Villani et al., 2019; Conca et al., 2021) and internal/interoceptive/affective experiences (Oosterwijk et al., 2015; Vigliocco et al., 2014), which are also important for learning abstract concepts (Ponari et al., 2018). Thus, abstract concepts constitute a more heterogeneous category (Roversi et al., 2013; Zdrzilova et al., 2018; Villani et al., 2019; Muraki et al., 2020; Muraki et al., 2020; Kiefer et al., 2022)

A limitation of these studies is that they have only investigated processing of decontextualized concepts (see e.g., Table 1 in a recent review by Del Maschio et al., 2022). That is, they (often implicitly) assume that conceptual representation in the brain is the product of a stable set of regions processing different types of information depending on whether a concept is concrete or abstract. However, this dichotomy may not account for the way in which we typically process concepts (Lebois et al., 2015), given that the information encoded during conceptual processing depends on the contextual information available. For example, the situated processing of concrete concepts like 'chair' could be linked to many abstract internal elements like goals ('I want to rest'), motivations ('I have been standing for two hours'), emotions ('I would like to feel comfortable'), and theory of mind ('is that older person more in the need of this chair than me?'). Conversely, an abstract concept like 'truth' is no longer particularly abstract when used in reference to a perceived physical situation (such

as 'snowing') that matches the utterance's meaning ('it is true that it is snowing'). Here, 'truth' refers to a concrete state of the world (Barsalou et al., 2018).

Indeed, previous work has postulated flexible conceptual processing in experiential brain circuits (Barclay et al., 1974; Barsalou, 1982 & 1987). Behavioural data support the view that contextual information can affect conceptual processing (Chambers et al., 2004; Cooper, 1974; Tanenhaus et al., 1995). For example, when an object is depicted in a context consistent with its use, the action associated with using the object is more readily available than when the context is more consistent with picking the object up (Kalenine et al., 2014). There is also neurobiological evidence that objects visually present in a situation can influence conceptual processing (Hoffman et al., 2013; Yee & Thompson-Schill, 2016). For example, the task-related colour-congruency of objects correlates with less activation of brain regions involved in colour perception during processing – likely because less retrieval of detailed colour knowledge was necessary (Hsu et al., 2011). Dynamic, context-dependent recruitment of visual and motor-related areas during semantic processing has also been established (Hoenig et al, 2008; van Dam et al, 2012; Popp et al, 2019). An understanding of conceptual knowledge as static and context-independent is insufficient to account for these dynamics (Pulvermüller, 2018).

However, no previous study has addressed whether the concrete/abstract dichotomy is affected by dynamic recruitment of brain areas during semantic processing. The present study aims to fill this gap and test the following two predictions. First, we submit that results from previous investigations of conceptual processing, which generally depict a stable dichotomy between concrete and abstract words, reflect the average experiential information of the type of situational context in which concepts are habitually experienced. Therefore, we predict that the neurobiological representation of concrete concepts, because they retain experiences



related to their physical referents that are predominantly characterised by sensory and motor information, will be related to associated brain regions (Pulvermuller, 2018; Willems et al., 2010). In contrast, because their representations mostly reflect information related to internal/interoceptive/affective experience as well as the relationship with other words, we expect abstract concepts to activate brain regions associated with emotional, interoceptive, and general linguistic processing (Reinboth & Farkaš, 2022).

Second, the reviewed work also suggests that these habitual representations are not necessarily stable and might change during naturalistic processing depending on the specific contextual information available. We specify two context conditions: a concept is displaced if its context offers little or no visual information related to the concept's external sensory-motor features. In contrast, a concept is situated, if its context contains visual objects related to its meaning. We predict that when a concrete concept is processed in displaced situations (e.g., 'cat' processed when discussing the general character traits of cats vs dogs), response profiles will shift towards more internalised processing and include regions related to processing of general linguistic information shared with abstract concepts. In contrast, when an abstract concept is processed in a situated context (for example the word 'love' processed in a scene with people kissing), its representation will more heavily draw on regions involved in processing external, visual information that otherwise characterise more concrete concepts.

We propose that this erosion of the concrete/abstract dichotomy for contextualised processing shows that both concrete and abstract concepts draw on information related to experience (external and internal) as well as linguistic association. Which associated neurobiological structures are engaged during processing depends dynamically on the contextual information available. This way of thinking about the representational nature of conceptual knowledge

may help reconcile contradictory evidence concerning the involvement of different brain areas during conceptual processing.

## **Materials and Methods**

The present study analysed the 'Naturalistic Neuroimaging Database' (NNDb) (Aliko et al., 2020). All code will be made available upon publication on a designated repository under <https://github.com/ViktorKewenig>.

### Participants and Task

The Naturalistic Neuroimaging Database (Aliko et al., 2020, <https://openneuro.org/datasets/ds002837/versions/2.0.0>) includes 86 right-handed participants (42 females, range of age 18–58 years,  $M = 26.81$ ,  $SD = 10.09$  years) undergoing fMRI while watching one of 10 full-length movies selected across a range of genres. All had unimpaired hearing and (corrected) vision. None had any contraindication for magnetic resonance imaging (MRI), history of psychiatric or neurological disorder, or language-related learning disabilities. All participants gave informed consent, and the study was approved by the University College London Ethics Committee.

### Data Acquisition and Preprocessing

Functional and anatomical images were obtained using a 1.5T Siemens MAGNETOM Avanto, equipped with a 32-channel head coil. Whole-brain images were captured, each consisting of 40 slices per volume at an isotropic resolution of 3.2mm. These were obtained using a multiband echo-planar imaging (EPI) sequence with no in-plane acceleration, a multiband factor of 4x, a repetition time of 1 second, an echo time of 54.8 milliseconds, and a flip angle of 75 degrees. Each study participant yielded a number of brain volumes equivalent

to movie runtime in seconds. Due to software constraints limiting the EPI sequence to 1 hour of continuous scanning, there were mandatory breaks during the movie for all participants.

The data were preprocessed with AFNI (Cox 1996) and included despiking, slice-time correction, coregistration, blurring and nonlinear alignment to the MNI152 template brain. The time series underwent smoothing using an isotropic full-width half-maximum of 6mm, with detrending accomplished through regressors for motion, white matter, cerebrospinal fluid, and run length. Adjustments were made to account for breaks in movie viewing, and artefacts identified by spatial independent component analysis were regressed out. Detailed information on data acquisition and preprocessing is available in Aliko et al. 2020 and on [openneuro.org](https://openneuro.org).

### Materials

All words in the movies were annotated using automated approaches with a machine learning based speech-to-text transcription tool from Amazon Web Services (AWS; <https://aws.amazon.com/transcribe/>). The resulting transcripts contained on and offset timings for individual words. However, as not all words were transcribed or accurately transcribed, timings were subsequently corrected manually.

Concrete and abstract words were selected for the present study from existing Brysbaert et al (2013) norms. In this database, 37,058 words were rated for concreteness on a scale from 0 (not experience based) to 5 (experience based) by over 4,000 participants. We median split only content words on this scale to yield our set of concrete and abstract words. These were matched for word frequency within 1 SD of mean log frequency (3.61), using the SUTBLEX (US) corpus (Brybaert & New, 2009), which contains frequency counts for 72,286 words. Concrete and abstract words were also matched to be within 1SD from mean length measured as number of letters (4.81).

After this matching process, we were left with more concrete words than abstract words in all movies (783 on average for concrete words; 440 for abstract words). To maintain equal numbers in the subsequent analysis, we randomly selected a subset of 440 concrete words in each movie to match the amount of abstract words, leaving us with 880 words (half concrete, half abstract) per movie on average. Mean concreteness rating for the resulting set of concrete words was 3.22, compared to 1.83 for abstract words. The final mean log frequency and mean length for the final set of concrete words was 3.69 and 4.91 compared to 3.46 and 5.27 for the final set of abstract words and were not significantly different as determined by t-tests (all  $p$ s > .45).

We used luminance and loudness to control for visual and acoustic properties of the movies that might vary more or less for concrete or abstract words. These 'low-level' features might be correlated with other potentially confounding auditory and visual variables. For example, luminance correlates significantly with stimulus intensity and contrast (Johnson & Casson, 1995) and loudness correlates with pitch (Wengenroth et al, 2014), prosody (E Couper-Kuhlen et al, 2004), and speaking rate (Kuhlmann et al, 2021). Thus, luminance and loudness for each frame in the movie was measured using the 'Librosa' package for music and audio analysis in Python (McFee et al, 2015). We then averaged these measures across the full duration of each word. Mean luminance for concrete words was 0.72, compared to 0.65 for abstract words. These were significantly different ( $t(4798) = 9.13$   $p < 0.001$ ). The mean loudness for concrete words was 0.69, compared to 0.77 for abstract words. These were also significantly different ( $t(4798) = 9.86$  ,  $p < 0.001$ ).

### **Conceptual Processing Across Contexts**

In this analysis we tested the prediction that when contextual information is collapsed over, the neurobiological organisation of conceptual processing will reflect brain systems involved

in experiential information processing, broadly in line with previous studies. Specifically, sensory and motor system engagement for concrete concepts and internal/interoceptive/affective and more general linguistic processing system engagement for abstract concepts. All statistical analyses on the preprocessed NiFTI files were carried out in AFNI (Cox, 1995, 1997). Individual AFNI programs used are indicated parenthetically or in italics in subsequent descriptions.

### Deconvolution Analysis

We used an amplitude (also known as parametric) modulated deconvolution regression to estimate activity associated with concrete and abstract words from the preprocessed fMRI data. In contrast to a standard convolution based regression analysis, deconvolution does not assume a canonical hemodynamic response function. Instead, an impulse response function (IRF) is estimated over a 20s time-window from stimulus onset at one second steps using multiple basis functions. This produces a better understanding of shape differences between individual hemodynamic response functions and achieves higher statistical power at both individual and group level (Chen et al, 2015). Furthermore, there might be differences in timing for the processing of concrete and abstract words (Kroll & Nerves, 1986). In particular, the 'concreteness effect' indicates that concrete words are processed faster and more accurately than abstract words (Paivio et al., 1994; Jessen et al., 2000; Fliessbach et al., 2006). These timing differences can be captured by our approach. We chose a 20s time window because this should be sufficient to capture the hemodynamic response function for each word. We selected 'Csplin' over the Tent function to deconvolve the BOLD signal because this function offers more interpolation between time points, which might result in a more precise estimate of the individual response function (but is computationally more costly).

Furthermore, traditional 'main effect' analysis confounds various non-specific processes, such as acoustic processing, which co-vary with each presented word (especially during dynamic, naturalistic stimuli). In contrast, amplitude modulation allows us to isolate regions that exhibit activation fluctuations specifically in relation to the concreteness modulator beyond the 'main effect' and fluctuations in the amplitude response caused by other modulators included in our model. Including nuisance modulators can help serve as controls, mitigating potentially confounding effects - in our case the significant differences between luminance and loudness. By adjusting for these sensory attributes, we ensure that the final betas from this analysis represent the estimated BOLD response specifically associated with concreteness.

Specifically, we estimated four sets of amplitude modulated IRFs for 1) abstract words; 2) concrete words; 3) remaining words; and 4) other time points. Both concrete and abstract words included word onset and five modulators, two of interest and three nuisance modulators. These were the independent ratings of concreteness and abstractness and luminance, loudness, and duration for each word. We also estimated the IRFs in the same manner and with the same amplitude modulators for all the remaining words in the movie that were not of interest to our hypothesis. Finally, we generated IRFs (without amplitude modulators) for all time points which did not include any speech.

The deconvolution model also included general linear tests for 1) abstract words under the curve; 2) concrete words under the curve; 3) contrasts between concrete and abstract words at each timepoint.

### Group Level Analysis

We then used the 20 amplitude modulated beta-coefficients from the concrete-abstract contrasts in a linear mixed effects model for group level analysis using '*3dLME*' (Chen et al.,

2013). The model included the factors ‘contrast’ with levels ‘abstract’ and ‘concrete’ and ‘time’ with 20 levels. The model also included a centred covariate for age of participant, and covariates for gender (2 levels) and movie ID (10 levels). Besides a random intercept for participant we included a control implemented in ‘3dLME’ for the potentially auto-correlative structure of residuals to make sure that we model the true effect estimates of the multiple basis function (Hefley et al., 2017). The final model formula was: *contrast + age + gender + movie*. We included 20 general linear tests, one for each contrast between concrete and abstract activation at each of the 20 timepoints, because we wanted to see how the amplitude of the activation associated with concreteness and abstractness changes over time. We thought that the timing and/or amplitude of the response for concrete and abstract words might vary and that this might be particularly true of the subsequent context analysis. However, we do not further analyse timing differences herein.

#### Correction for Multiple Comparisons

To correct for multiple comparisons in the LME, we used a multi-threshold approach rather than choosing an arbitrary  $P$  value at the individual voxel level threshold. In particular, we used a cluster simulation method to estimate the probability of noise-only clusters using the spatial autocorrelation function from the LME residuals (*3dFWHMx* and *3dClustSim*). This resulted in the cluster sizes to achieve a corrected alpha value of 0.01 at 9 different  $P$  values (i.e., 0.05, 0.02, 0.01, 0.005, 0.002, 0.001, 0.0005, 0.0002, and 0.0001). We thresholded each map at the corresponding z-value for each of these nine p-values and associated cluster sizes. We then combined the resulting maps, leaving each voxel with its original z-value. For additional protection and presentation purposes, we use a minimum cluster size 20 voxels for all results (using *3dMerge*). For tables, we determined the centre of mass for each of these

clusters using '3dCM'. See Cox, 2017 for a validation of a related method and Skipper et al., 2022 for an earlier application.

### Analyses of experiential features

In order to more closely characterise the functional specificity of the spatial activation maps from the preceding LME analysis, we carried out the following two additional analyses. In both, the goal is to determine whether brain activity associated with concrete and abstract word modulation relates to separable experiential domains that roughly map onto the aforementioned sensory-motor vs internal/interoceptive/affective/linguistic distinction, respectively.

#### *1. Meta-Analytic Descriptions*

The resulting coordinates of the centre of mass of each cluster associated with modulation of concreteness and abstractness were input into Neurosynth (<https://neurosynth.org/>, Yarkoni et al., 2011), an online tool that includes activation maps of 14,371 neuroscientific studies (accessed April, 2023). Neurosynth automatically mines all words in titles and abstracts of these articles and performs a two-way ANOVA, testing for the presence of a non-zero association between terms reporting activation that overlaps with the input location. We scraped all terms with z scores above 3.12 ( $p < 0.001$ ) (excluding those related to specific brain regions and nondescript terms related to methods, tasks or results) and repeated this procedure for each concrete and abstract cluster to determine functionally associated terms. We then tested whether any of these terms were more important for concrete or abstract words across clusters using a Kruskal Wallis test. We did not correct for multiple comparisons, as this analysis was exploratory in nature and we did not have a prediction about how many terms we would end up with.



## 2. *Peak and Valley Analysis*

The meta-analytic approach can only provide relatively general functional descriptions of concrete and abstract words as it is based only on high frequency terms in published titles and abstracts. To provide more precise functional specificity, we used a variant of the 'reverse correlation' method (Hasson et al., 2004), called the 'Peaks and Valleys Analysis' (Hasson et al., 2008; Skipper et al., 2009). For each participant, this analysis averaged the timeseries of voxels within clusters of modulated activity associated with concreteness and abstractness and relates this directly to features of the perceived stimulus. The approach assumes that, if a brain region encodes certain features, e.g. sensorimotor features, valence, or arousal, then activity will rise (creating peaks) in that region when the feature is present in the stimulus and fall (resulting in valleys) when it is absent.

Specifically, for concrete clusters, we expected significantly more sensory-motor features (i.e., 'Foot\_Leg', 'Hand\_Arm', 'Haptic', 'Visual' and 'Torso' in the corpora) to be associated with peaks rather than valleys in the timeseries compared to abstract clusters. Conversely, we expected significantly more experiential features related to internal/interoceptive/affective processing (i.e., 'Interoception', 'Valence', and 'Arousal' in the corpora) to be associated with peaks compared to valleys for abstract relative to concrete clusters. It was not clear to us whether the dimensions ('Auditory', 'Head', 'Mouth' and 'Gustatory') were more related to internal/interoceptive/affective or sensory-motor processing. Therefore, we made no predictions for those.

To accomplish this, we first extracted the averaged timeseries for each activation cluster for the concrete and abstract modulations across voxels using *3dMerge*. Next, we determined peaks and valleys by calculating the discrete difference ' $\Delta$ ' along the timeseries ' $x$ ' for each value ' $i$ ' using the '*Numpy*' Python package (Harris et al, 2020) (Figure 1, (1)), where  $\Delta x[i] =$

$x[i + 1] - x[i]$ . Given that the canonical model of the hemodynamic response function is said to peak at around 6s after stimulus onset for stimuli of our length, we extracted the words that were mentioned at each peak and valley in a given cluster's timeseries with a 5- and 6-seconds lag (Figure 1, (2)). We then used the Lancaster sensorimotor norms (Lynott et al, 2019) and norms for valence and arousal (Warriner, 2013) to determine a 13-dimensional experience-based representation for each word (Figure 1, (3)), which included the dimensions: 'Auditory', 'Gustatory', 'Haptic', 'Interoception', 'Visual', 'Hand\_Arm', 'Foot\_Leg', 'Torso', 'Mouth', 'Head', 'Olfactory', 'Valence', and 'Arousal'.

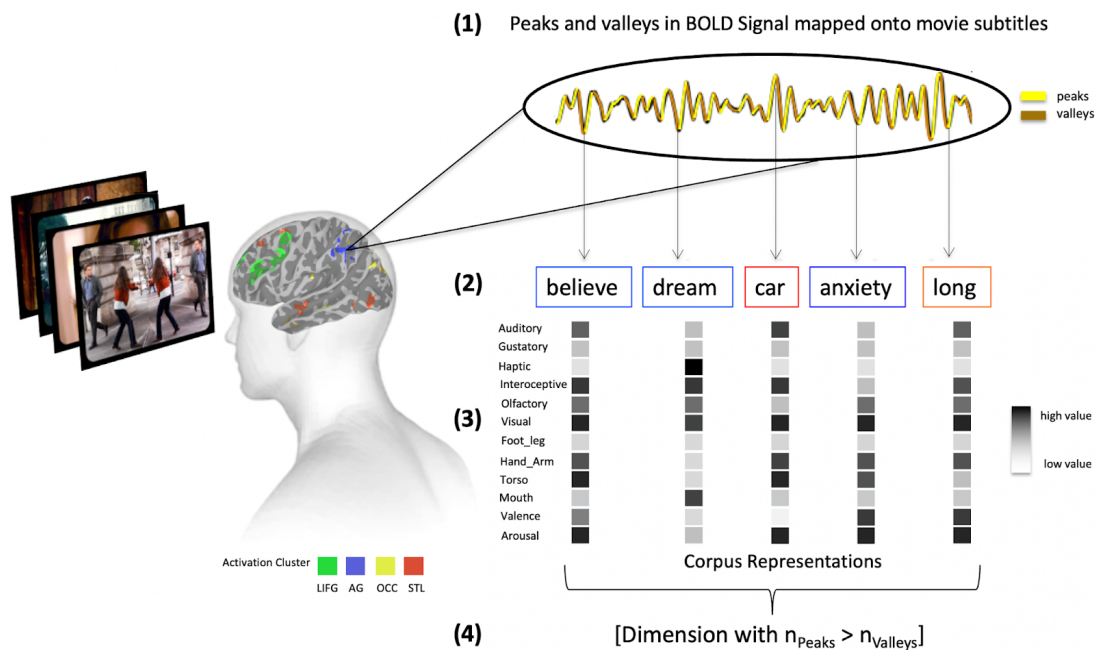

**Figure 1.** Overview of the peak and valley analysis method. First, we average the fMRI timeseries for each participant, for each abstract, concrete, and overlap cluster of activity from Figure 1. Then we label peaks and valleys in these (1) and map them onto word on- and off-set times (2). Finally, we estimate sensorimotor as well as valence and arousal representations for each abstract (blue frame) and concrete word (red frame) (3) and determine which dimensions are associated with significantly more peaks than valleys across participants in each cluster using a Kruskal Wallis test (4).

For each of these dimensions, we created two categorical arrays, one for peaks and one for valleys, noting down 0 if the word mentioned at a peak or valley was not highly rated on the dimension and 1 if it was rated highly. This was defined as a deviation of at least one standard deviation from the mean. Given the distributional nature of this data, we then conducted a Kruskal Wallis test between these arrays to determine whether a given experiential dimension occurred significantly more with peaks than valleys in the averaged timeseries of a cluster (Figure 1, (4)). We repeated this procedure for both a 5s and a 6s timeseries lag and conducted a cosine-similarity test between each result (using the '*Sklearn*' package in Python (Pedregosa et al, 2011) in order to determine if they were significantly different.

### **Conceptual Processing in Context**

The previous analyses tested whether, when activation is considered across contexts, concrete and abstract words are processed in separable brain regions encoding different types of experiential information. Here, we test if these response profiles dynamically change depending on the visual object context. We predict that when abstract concepts are situated in highly related contexts, they engage neurobiological regions that are usually involved in processing concrete concepts and are related to processing of external information (e.g. visual). Conversely, when concrete concepts are displaced from surrounding context, we predict them to engage more abstract-like regions in the brain that are related to processing of internal/interoceptive/affective information. Note that we chose to do the analysis in two stages because only a subset of the 440 words used in our analysis across context for concrete and abstract words are related to the objects present in the scene in a way that situates them in visual context (see below). We wanted to have as much power as possible for the first deconvolution/LME to look beyond the effects of context.

## Estimating Contextual Situatedness

To test our predictions, we estimated a measure of contextual situatedness for each concrete and abstract word included in the first analysis. To that end, we utilised two pre-trained visual recognition models, Faster R-CNN (Ren et al., 2015) and OmniSource (Duan et al., 2020), to extract object features using computer vision toolboxes (Chen et al., 2019; MMCV Contributors, 2018; MMAAction2 Contributors, 2020), respectively. For each prediction frame (about every four frames, i.e.,  $4 \times 0.04 = 0.16$  s), the object recognition model generated a list of detected object labels and kept those that had a prediction confidence of 90% or greater (Figure 2, (1)). Then, we excluded all objects that were recognized at least 3 standard deviations more often by the model compared to the mean recognition rate of objects (which was 682 appearances), because they would bias our measure of situatedness. These labels were 'person' (17,856 appearances per movie on average), 'chair' (9,718 appearances per movie on average) and 'tie' (8,123 appearances per movie on average). After exclusion of these labels, the final object features were represented as the average of the vectorized object labels using GloVe (Pennington et al, 2014 (Figure 2, (2))), which represents the meaning of each label via global co-occurrence statistics.

We then estimated a representation of a 2s (or 60 frames) context window, which should capture the immediate visual context leading up to each concrete and abstract word. We extracted all the labels of objects visually present in each frame within that window. Finally, we calculated the cosine similarity between the vector representation of each word and its context average, using the '*Sklearn*' package in Python (Pedregosa et al, 2011), to estimate contextual situatedness for each concrete and abstract word (a value  $c$  between 0 and 1), Figure 2, (3)). After separating into situated ( $c > 0.6$ ) and displaced words ( $c < 0.4$ ), we were left with (on average for each movie) 164 abstract situated words, 201 abstract displaced

words, 215 concrete situated words and 172 concrete displaced words. Given that, as concerns observations, the abstract situated condition was the limiting condition, we randomly selected words from the abstract displaced, concrete situated and concrete displaced conditions to have an equal number of 164 words in each condition (on average per movie).

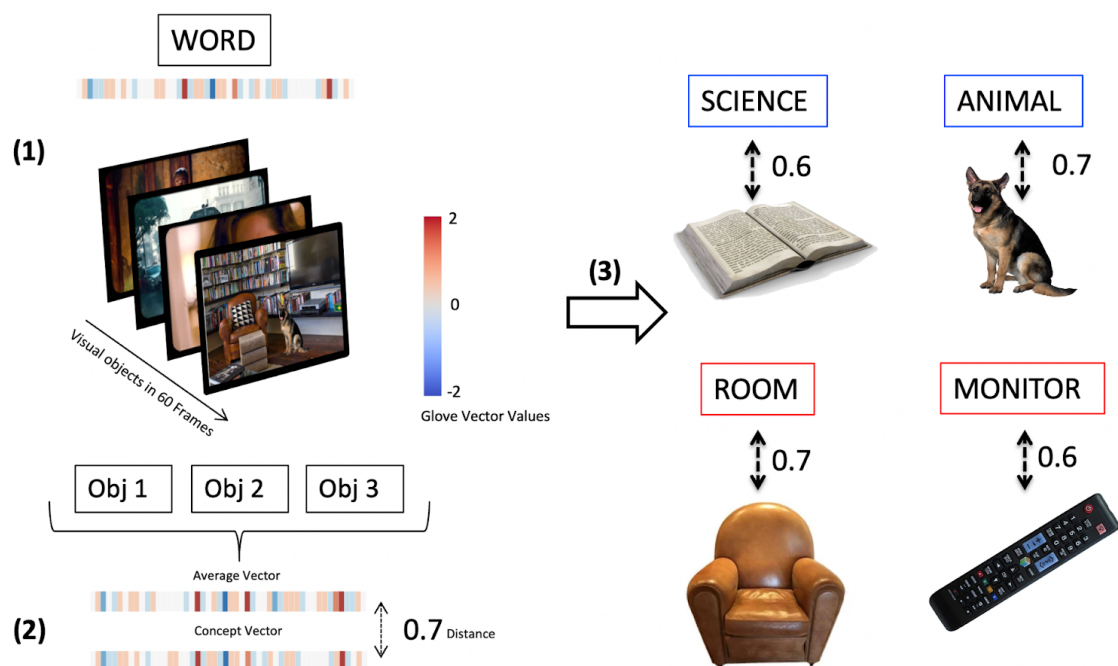

**Figure 2.** Method for estimating contextual situatedness for each concrete and abstract word to model context-dependent modulation of conceptual encoding. We use visual recognition models for automatically extracting labels that were visually present in the scene (60 frames, ~2 seconds) before a given word was mentioned in the movie (1). We then correlate an average GloVe Vector embedding of all these labels with a GloVe Vector embedding of that word to estimate how closely related the labels of objects in the scene are to the word (2). Displayed are four randomly extracted measures of situated abstract (blue frame) and concrete (red frame) words (3) together with the objects that were visually present in the scene.

Though we use visual nuisance regressors, we note that there may be additional confounding visual information when estimating contextual situatedness: high situatedness may correlate positively with the number of objects present and therefore 'naturally' engage visual processing more for abstract situated concepts. To alleviate this concern, we determined that there were only 872 more objects present in the abstract situated (8315 objects across movies) as compared to the abstract displaced condition (7443 across movies). A Kruskal Wallis test showed that this difference was not statistically significant ( $H(2)=4.1$ ,  $p < .09$ )

### Deconvolution Analysis

The deconvolution was as described previously except that the subset of concrete and abstract words used (see above) were broken into four equal sets of regressors, i.e., situated concrete, displaced concrete, situated abstract, and displaced abstract words and modulators. The four contrasts included were accordingly (1) between abstract situated and abstract displaced, (2) between concrete situated and concrete displaced, (3) between abstract situated and concrete situated and (4) between abstract displaced and concrete displaced. After this process, we were left with 164 words in each of these four conditions per movie on average. Mean concreteness rating for the resulting sets of concrete words were 3.39 for displaced words and 3.35 for situated words, compared to 1.84 for abstract situated words and 1.71 for abstract displaced words. The mean log frequency and mean length for concrete words was 4.91 and 4.88 for situated words and 5.33 and 4.91 for displaced words, compared to 5.11 and 5.08 for abstract situated words and 5.20 and 5.27 for abstract displaced words. T-tests between the ratings of all groups revealed no significant differences.

### Group Level Analysis

A linear mixed effects model for group level analysis was conducted on the 20 amplitude modulated betas from each condition (concrete situated, abstract situated, concrete displaced,

situated displaced) using '3dLME' (Chen et al., 2013). The model included factors 'word\_type' (concrete and abstract), 'context' (displaced and situated), and 'time' (20 levels) and all possible interactions between these factors. We again included covariates for age, gender, and movie, a random intercept for participant, and a control of the auto-correlative structure of residuals. The final model formula was:  $word\_type * context * time + age + gender + movie$ . We had no prediction on whether the timing and/or amplitude of the response for concrete and abstract words would vary in the present analysis. Therefore we included 4 general linear tests, 1 for each contrast across time: 1 for the abstract situated vs. abstract displaced contrast, 1 for the concrete situated vs. concrete displaced contrast, 1 for the abstract situated vs abstract displaced contrast, and 1 for the concrete situated vs concrete displaced contrast.

## Results

### Conceptual Processing Across Contexts

Consistent with previous studies, we predicted that across naturalistic contexts, concrete and abstract concepts are processed in a separable set of brain regions. To test this, we contrasted concrete and abstract modulators at each time point of the IRF (Figure 3). This showed that concrete produced more modulation than abstract modulation in the frontal lobes, including the right posterior inferior frontal gyrus (IFG) and the precentral sulcus (Figure 3, red). In the temporal lobes, greater modulation occurred in the bilateral transverse temporal gyrus and sulcus, planum polare and temporale, and superior temporal gyrus (STG) and sulcus (STS). In the parietal and occipital lobes, more concrete modulated activity was found in large bilateral swaths of the precuneus, occipital cortices (running into the inferior temporal lobe),



and the ventral visual stream. Finally, subcortically, the dorsal and posterior medial cerebellum were more active bilaterally for concrete modulation.

Conversely, activation for abstract was greater than concrete modulation of words in the following regions (Figure 3, blue): In the frontal lobes, this included right anterior cingulate gyrus, lateral and medial aspects of the superior frontal gyrus. More left frontal activity was found in both lateral and medial prefrontal cortices, and orbital gyrus, posterior IFG, precentral sulcus. In the parietal lobes, bilateral activity was greater in the angular gyri (AG) and inferior parietal lobules, including the postcentral gyrus. In the temporal lobes, activity was restricted to the STS bilaterally. Subcortically, activity was bilaterally greater in the anterior thalamus, nucleus accumbens, and left amygdala for abstract modulation.

Finally, there was overlap in activity between modulation of both concreteness and abstractness (Figure 3, yellow). The overlap activity is due to the fact that we performed general linear tests for the abstract/concrete contrast at each of the 20 timepoints in our group analysis. Consequently, overlap means that activation in these regions is modulated by both concrete and abstract word processing but at different time-scales. In particular, we find that activity modulation associated with abstractness is generally processed over a longer time-frame. In the frontal, parietal, and temporal lobes, this was primarily in the left IFG, AG, and STG, respectively. In the occipital lobe, processing overlapped bilaterally around the calcarine sulcus.



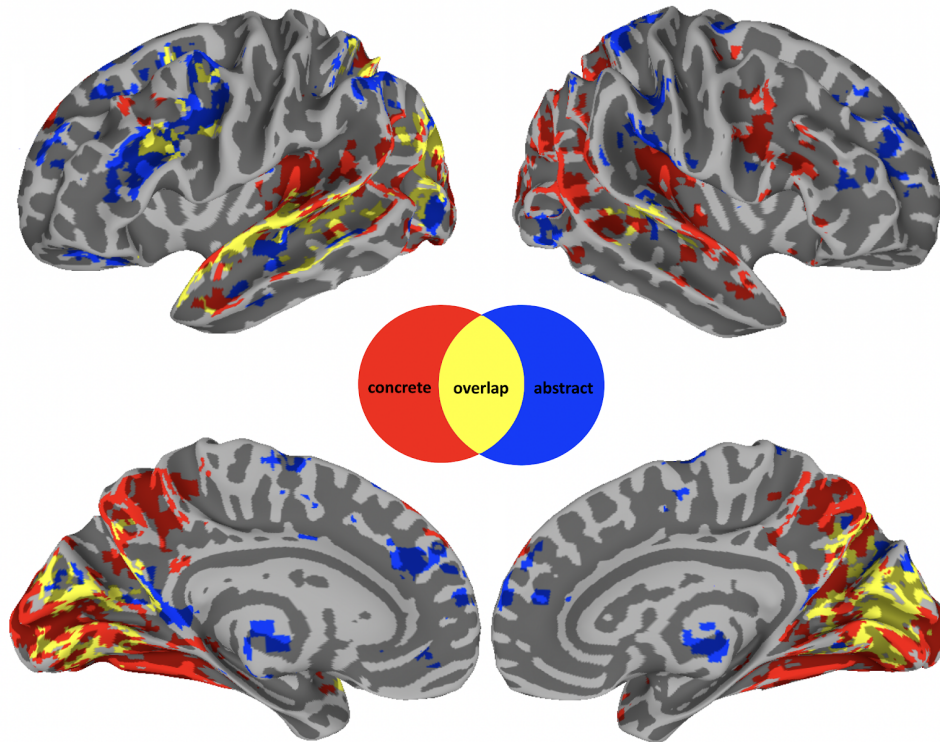

**Figure 3.** Neurobiology of conceptual processing across contexts. Coloured regions show group level results from a linear mixed effect model and subsequent general linear tests contrasting activity for concrete (red) versus abstract (blue) modulation at each of 20 timepoints after word onset. Overlapping regions (yellow) indicate a concrete and abstract difference at one of these timepoints. Results are thresholded and corrected for multiple comparisons at  $\alpha = 0.01$  and displayed with a cluster-size  $\geq 20$  voxels.

### Meta-Analytic Results

Overall, these results suggest that concrete modulation engages sensory and motor regions more, whereas abstract words engage regions more associated with semantic as well as internal/interoceptive/affective processing. Both categories overlap (though necessarily at different time points) in regions typically associated with word processing. However, these interpretations are based on informal reverse inference. To more formally and quantitatively evaluate this distinction between concrete and abstract words, we employed meta-analytic

description and reverse correlation analyses. Both test whether brain regions involved in concrete and abstract conceptual processing reflect different types of habitual experience (i.e., sensory-motor vs internal/interoceptive/affective).

Term-based labelling demonstrates that significantly more concrete clusters are related to the term 'Movement' compared to abstract clusters ( $H(2) = 12.4$ ,  $p < 0.001$ ; Figure 4, red). In contrast, abstract clusters are more related to terms that are arguably associated with internal/interoceptive/affective processing compared to concrete activation clusters, i.e., 'Autobiographical Memory', 'Nausea', 'Pain', 'Reward/Motivation', and 'Valence' (all  $p$ s  $< 0.05$ ; Figure 4). Finally, 'Language' was the only term more associated with overlapping clusters than either concrete ( $H(2) = 7$ ,  $p < 0.001$ ) or abstract clusters ( $H(2) = 4$ ,  $p = 0.045$ ; Figure 4). For meta-analytic associations of each individual cluster, see (Table S1).

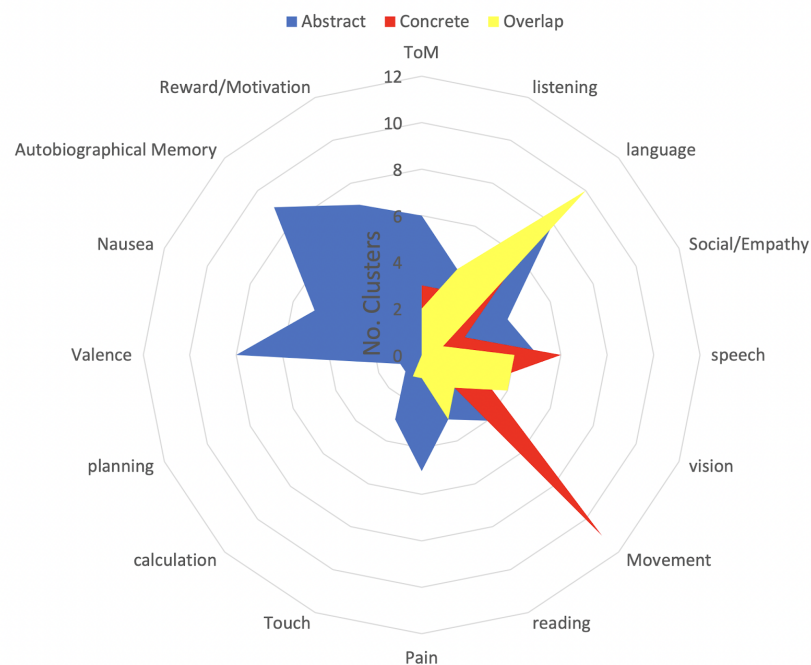

**Figure 4.** Meta-analytic description of conceptual processing across contexts. We used the Neurosynth meta-analysis package to find the terms associated with the centres of mass for each concrete (red), abstract (blue), and overlap (yellow) cluster from Figure 1. Numbers refer to the number of activation clusters associated

with each meta-analytic term. There were significantly more concrete than abstract clusters for the term 'Movement' ( $p < .001$ ), whereas there were more abstract compared to concrete clusters for 'Autobiographical Memory', 'Nausea', 'Pain', 'Theory of Mind', and 'Valence' (all  $ps < 0.05$ ). The term 'language' was significantly more associated with overlap clusters compared to concrete ( $p < 0.001$ ) and abstract clusters ( $p = 0.045$ ).

### Peaks and Valleys Results

Comparing dimensions for abstract vs concrete modulated clusters, we found significantly more concrete compared to abstract clusters associated with the dimension 'Torso' ( $H(2) = 7$ ,  $p < 0.001$ ). Three concrete clusters were associated with 'Haptic' and 'Mouth', which was also significantly more than for abstract clusters (all tests  $H(2) = 5.2$ , all  $ps = 0.02$ ). Two concrete clusters with 'Foot\_Leg' compared to 0 abstract clusters was not significant, but the mean was in the expected direction ( $H(2) = 3.4$ ,  $p = 0.06$ ). All concrete clusters are displayed in Figure 5 (red). Conversely, eight abstract clusters were significantly more associated with the dimension 'Valence', which was significantly more than for concrete clusters ( $H(2) = 8.3$ ,  $p < .001$ ). Three abstract clusters were associated with the dimension 'Auditory', which was not significantly more clusters than for concrete ( $H(2) = 1.9$ ,  $p = 0.17$ ). All abstract clusters are displayed in Figure 5 (blue). Finally, five clusters in which modulation through concreteness and abstractness overlapped (though at different time points) were significantly more associated with the dimension 'Mouth' compared to 2 concrete clusters ( $H(2) = 5.1$ ,  $p = 0.03$ ) and 0 abstract clusters ( $H(2) = 7.8$ ,  $p < .001$ ). All overlap clusters are displayed in Figure 5 (yellow). For all results of the peak and valley tests for each individual cluster, see Table S2.

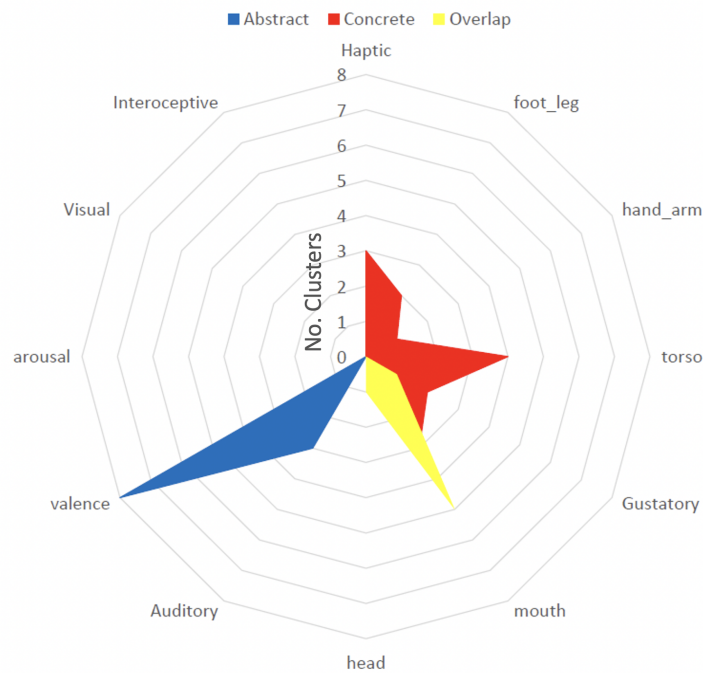

**Figure 5.** Peak and valley analysis results for understanding conceptual processing across contexts. We extract the type of information processed in each activation cluster by looking at experience-based features of movie words that are aligned with significantly more peaks than valleys (see Figure 3). Words highly rated on the sensorimotor dimensions 'Haptic', 'Hand\_Arm', and 'Torso' were significantly more associated with concrete clusters (red, all  $p$ s < .05), 'Valence' with abstract clusters (blue,  $p$  < .001) and 'Mouth' with overlap clusters (yellow,  $p$ s < .05).

### Conceptual Processing in Context

Previous studies suggest that neurobiological activity underlying semantic processing may change as a function of different visual contexts. In this analysis, we wanted to understand what this meant for the distinction between concrete and abstract concepts. We hypothesised that displacing concreteness would cause a shift towards more internalised and potentially general linguistic processing, whereas situating abstractness would cause a shift towards processing external visual information.

Activation for the main effect of context was found bilaterally in posterior temporal lobe at the intersection with occipital lobe, as well as in nodes of the default mode network (DMN), including precuneus, medial prefrontal regions and angular gyrus (figure S3). Activation associated with the main effect of word\_type overlapped with processing of concrete and abstract words across context in superior temporal sulcus, superior temporal gyrus and middle temporal gyrus (bilateral), in angular gyrus (bilateral), in the central sulcus and precentral and postcentral gyrus (right hemisphere), in lateral and medial frontal cortices as well as in the occipital lobe (see figure S4). The interaction between word\_type and context modulated activity in the main nodes of the DMN (amongst other regions), including precuneus, medial prefrontal regions, and angular gyrus (all bilaterally, see figure S5). Indeed, the thresholded interaction map with 1501 voxels was 'decoded' using the Neurosynth package, where the Pearson correlation is computed between the vectorized map and all the maps in the Neurosynth database. The top four associated terms (excluding brain regions or methodological terms) were the 'DMN' ( $r(1500) = 0.194$ ,  $p < 0.001$ ), 'Default Mode' ( $r(1500) = 0.219$ ,  $p < 0.001$ ), and 'Default' ( $r(1500) = 0.226$ ,  $p < 0.001$ ) as well as 'Semantic Control' ( $r(1500) = 0.206$ ,  $p < 0.001$ ).

To better understand the nature of this interaction and how it relates to response profiles associated with concreteness and abstractness across contexts, we contrasted concrete vs abstract modulation in situated and displaced conditions (across timepoints, as we had no prediction about timing differences) and spatially compared the resulting activation maps with the brain map obtained from contrasting concreteness and abstractness across contexts (Figure 6).

To quantify this comparison, we used cosine similarity to calculate spatial correlation measures between the unthresholded results from contrasting concrete and abstract

modulations in displaced and situated context with the unthresholded contrasts between concrete and abstract modulations across contexts (Figure 1, red is the thresholded version of this map). This shows that in situated context, the contrasted modulation by abstractness (Figure 6, A, purple) overlaps more with concreteness across context ( $r(72964) = 0.64$ ,  $p < 0.001$ ) (Figure 6, A, red) compared to displaced concreteness ( $r(72964) = 0.165$ ,  $p = 0.476$ ) (Figure 6, A, magenta). Concreteness across contexts overlaps with situated abstractness bilaterally in the fusiform, occipital lobe, inferior and superior parietal lobules and with displaced concreteness bilaterally in the occipital lobe, as well as large swaths of the superior temporal gyrus (Figure 6, A).

Conversely, in displaced context, the contrasted modulation by concreteness (Figure 6, B, purple) overlaps more with the pattern of activity modulated by abstractness across context ( $r(72,964) = 0.49$ ,  $p < 0.001$ ) (Figure 6, B, blue) compared to situated abstractness ( $r(72,964) = 0.21$ ,  $p < 0.001$ ) (Figure 6, B, light magenta). Abstractness across contexts overlaps with displaced concreteness bilaterally in large portions of the inferior parietal lobule, including supramarginal gyrus and post superior temporal sulcus, up to the intersection of the occipital and temporal lobes, lingual gyrus in particular. Overlap activation could also be found bilaterally in anterior thalamus and medial prefrontal regions. Overlap between abstractness across context and situated abstractness is found in fusiform (bilaterally) and the superior occipital lobe as well as the superior parietal lobe (Figure 6, B).



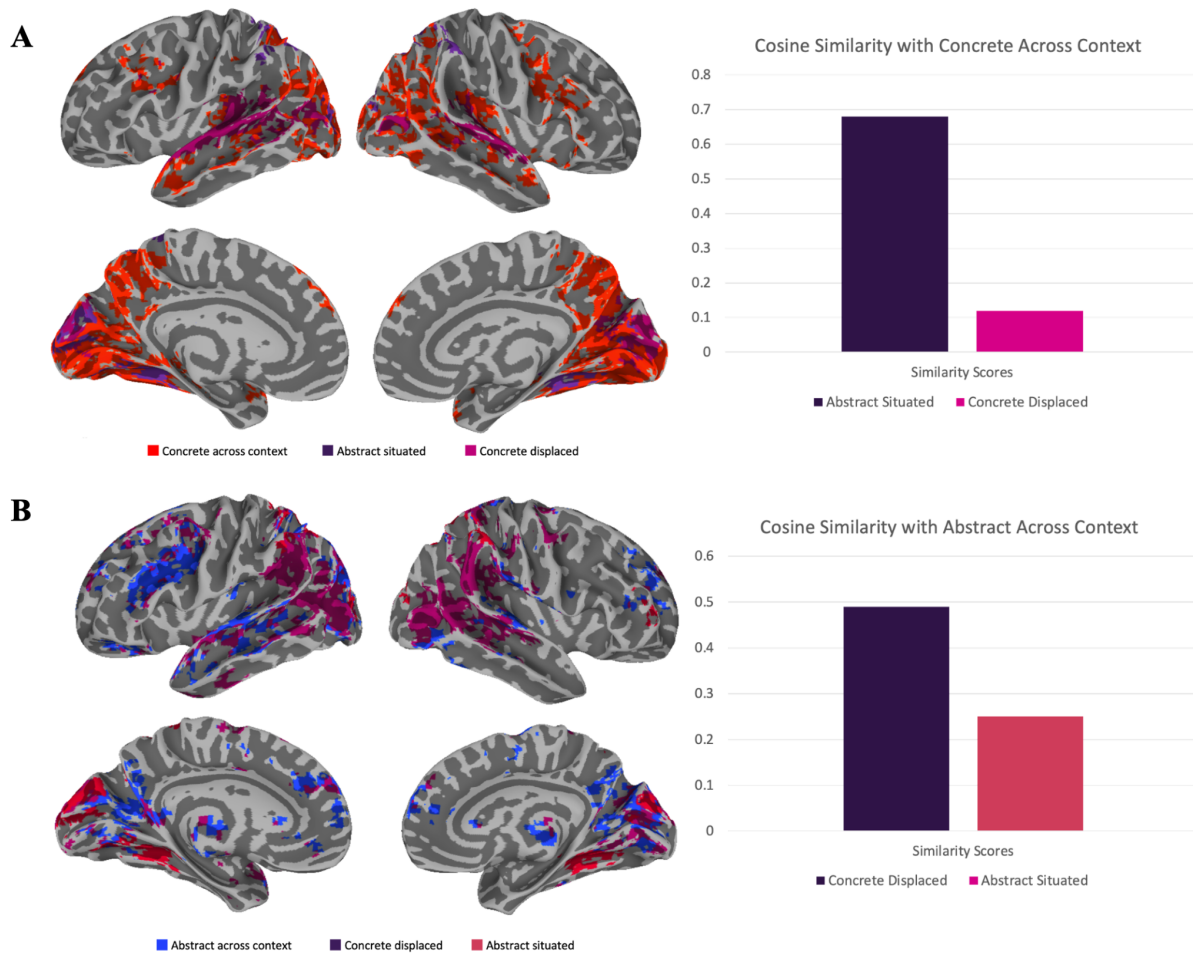

**Figure 6.** Spatial overlap between thresholded statistical brain images of concrete and abstract conceptual processing obtained from the original analysis across contexts and from the situatedness/displacement contrasts. Results show overlap of concreteness across contexts (red) with situated abstractness (purple) and displaced concreteness (magenta) (panel A). Overlap between abstractness across context (blue) with displaced concreteness (purple) and situated abstractness (light magenta) are displayed in panel B. All maps were thresholded at  $\alpha = 0.01$  with a cluster-size  $\geq 20$  voxels.

## **Discussion**

Conceptual processing is typically investigated in experiments where words are stripped away from their naturally occurring context: most studies use isolated words, and sometimes sentences (see Table 1 in Maschio et al, 2022). However, conceptual processing in its ecology occurs in rich multimodal contexts. Our study investigated naturalistic conceptual processing during movie-watching to begin to understand the effect of multimodal context on the neurobiological organisation of real-world conceptual representation.

### **Conceptual Processing Across Contexts**

First, we asked where in the brain concrete and abstract concepts are processed across different contexts as well as the type of information they encode. Given the hypothesis that conceptual representations reflect contextual information, we expected a set of regions that correspond to the most typical set of experiences (e.g., as encountered during word learning in development) to activate across different contexts. Specifically, we expected concrete conceptual encoding to activate regions more involved in sensory and motor processing and abstract conceptual encoding to activate regions associated with more internal/interoceptive/affective as well as general linguistic processing (Fernandino et al., 2019; Meteyard et al., 2012; J. R. Binder, 2005).

Indeed, we found a general tendency for concrete and abstract words to activate regions associated with different experiences (Figure 1). Consistent with prior work, concrete words were associated with multiple regions involved in sensory and motor processing (Mkrtychian et al., 2019), including most of the visual system (Gao et al., 2019) and the right frontal motor system (Pulvermuller, 2005). In contrast, abstract words engaged regions typically associated with internal/interoceptive/affective processing (anterior thalamus, somatosensory cortex)(Harpaintner et al., 2018; Villani et al., 2021), autobiographical memory (anterior



medial prefrontal regions) (Conca, Borsa, et al., 2021), and emotional processing and regulation (anterior medial prefrontal regions, orbital prefrontal cortex, dorsolateral prefrontal cortex, nucleus accumbens and amygdala) (Vigliocco, 2014; Conca, Catricala, et al., 2021).

Consistent with this, both meta-analytic and peak and valley analyses showed that concrete regions were more associated with sensory-motor properties (e.g., 'Movement' and 'Hand\_Arm') whereas abstract regions were more associated with internal/interoceptive/affective properties (e.g., 'Valence'; Figures 2-4). Together, these results provide evidence from naturalistic processing that concrete and abstract concepts encode different types of experiences (Vigliocco et al., 2009; Wiemer-Hastings & Xu, 2005; Kiehl et al., 1999).

However, the regions involved in processing concrete and abstract concepts across contexts did not imply a fully dichotomous encoding of experiences. First, we found that regions involved in sensory (mostly in visual cortices) and motor processing are involved in processing both types of words (Figure 1). Moreover, we found overlap activation in regions associated with language processing in general (Tang et al, 2021, Figure 1). Such results are in line with proposals in which both concrete and abstract representations rely on experiential information as well as their linguistic relationships with other words (e.g., Andrews, Vigliocco & Vinson, 2009; Vigliocco et al., 2009, Piantadosi & Hill, 2022). This latter hypothesis may also be supported by our Peaks and Valleys analysis, more specifically that information related to 'Mouth' (i.e. the language organ) drives activation in overlap clusters. This is furthermore evidence against hypotheses in which the mouth is specifically associated with abstract concepts (Borghi, 2016) .

## Conceptual Processing in Context

Though results across contexts presumably represent a form of experiential central tendency, the behavioural, neuroimaging, and electrophysiological literature suggests that conceptual representations might not be stable and may vary as a function of context (Elman, 1995; Spivey & Dale, 2006 in Cai & Vigliocco, 2018; Kutas & Federmeier, 2011; Yee & Thompson-Schill, 2016, Deniz et al., 2023). For this reason, we conducted a second set of analyses with the goal of understanding the extent to which representations associated with concrete or abstract conceptual processing in the brain change as a function of context (Barsalou & Wiemer-Hastings, 2005).

We find that brain activation underlying concrete and abstract conceptual processing fundamentally changes as a function of visual context. We compared the activation profiles of concrete and abstract concepts in displaced and situated contexts with the activations obtained when collapsing across contexts. Our results show that concrete concepts become more abstract-like in displaced contexts with less relevant visual information (Figure 6a). Overlap between activation for concrete concepts in displaced conditions and abstract concepts across context can be found in ACC, thalamus, and large swaths of the anterior, middle and posterior temporal lobe. We propose that this is because, when a concrete concept is processed in displaced context, its representation will relate more to internal/interoceptive variables and linguistic associations, which are usually encoded by abstract concepts. Conversely, abstract concepts become more concrete-like when they are highly situated (Figure 6b). Overlap between activation for abstract concepts in situated conditions and concrete concepts across context can be found in fusiform and the occipital lobe (bilateral). We propose that this is because an abstract concept processed in a situated context relates more to external visual information, which is usually encoded by concrete concepts. A

consequence of this finding is that the concrete/abstract distinction is neurobiologically less stable than might be assumed. Brain regions 'switch alliance' during concrete or abstract word processing depending on context.

What is the neurobiological mechanism behind contextual modulation of conceptual encoding in the brain? Our results indicate that variance in visual context interacted with word-type (both concrete and abstract) in regions commonly defined as the DMN, as well as a set of prefrontal regions associated with semantic control (Ralph et al, 2017; Hoffman et al, 2018) (Figure S3, S5). Recent literature on the role of the DMN suggests that these regions reactivate memories (Crittenden et al., 2015, Konishi et al., 2015, Murphy et al., 2019, Murphy et al., 2018, Sormaz et al., 2018, Spreng et al., 2014, Vatansever et al., 2017) and contexts-specific information (Hahamy et al., 2023), possibly to form contextually relevant situation models (Chen et al., 2017, Keidel et al., 2018, Ranganath and Ritchey, 2012, Smith et al., 2021, Smith et al., 2018), in order to guide semantic cognition (Binder et al, 1999; Binder & Fernandino, 2015; Yeshurun et al., 2021; Tong et al, 2022).

Breaking up the interaction between word\_type and context, we find that the DMN is especially involved in displaced conditions for both concrete and abstract conceptual processing (see figure S6). These results fit well with evidence suggesting that the DMN supports conceptual processing especially when displaced from sensorimotor input (Murphy et al., 2018; Lanzoni et al., 2020; Wang et al., 2020). Accordingly, the DMN is most strongly activated in the displaced conditions involving abstract concepts. Given their inherent lack of sensorimotor information, abstract concepts offer a greater degree of displacement than their concrete counterparts, thereby demanding a higher engagement of the DMN in these conditions.

## **Conceptual Processing and Language**

The exact relationship between concepts and language remains an open question, but it is undisputed that, as determinants of meaning, concepts are necessary for language (Jackendoff, 2002; Bloom, 2002; Fauconnier & Mark, 2002). The present study examined language-driven conceptual processing, as we looked at brain activation during word processing. Our results imply that the underlying neurobiological processes are dynamically distributed and contextually determined. This view fits well with models of ‘natural’ organisation of language in the brain where it is argued that language processing more generally is a whole brain process whose patterns of activation are determined by available context (Skipper, 2014; 2015). These more distributed regions are typically averaged away when indiscriminately analysed together and following thresholding because (i) they are more variable given they are associated with different experiences (as we have seen here), linguistic categories (e.g., ‘formulaic speech’; see Skipper et al., 2022), and processes (e.g., different types of syntax) (ii) there are individual differences in all of these (e.g., Wang et al, 2022; Skipper et al, 2022; Skipper, 2015). These suppositions are supported by the fact that concrete and abstract modulation only overlaps in typical perisylvian ‘language regions’ (Figure S7).

## **Conclusions**

Our work emphasises the merits of investigating conceptual processing in naturalistic multimodal contexts. This paves the way for future analyses systematically quantifying different types of contexts (e.g. in terms of related objects, actions, emotions, or social interactions) and examining how these can affect conceptual processing in the brain. Such work might not only further our understanding of the neurobiology of conceptual processing

in naturalistic settings, but also aid in the development of better artificial models by clarifying what type of contexts affect processing and how. This becomes especially important with the recent development of multimodal large language models, where processing depends on context beyond purely text based information (Driess, 2023). Apart from commercial applications, gaining a better understanding of the mechanisms underlying naturalistic conceptual processing in the brain might bear important implications for clinical domains, e.g., by informing progress towards helping patients who lost the ability to speak by real-time semantic reconstruction of non-invasive brain recordings with the help of large language models (Tang et al, 2023).

## **Funding**

This work was supported in part by the European Research Council Advanced Grant (ECOLANG, 743035); Royal Society Wolfson Research Merit Award (WRM\R3\170016) to GV; and Leverhulme award DS-2017-026 to VK and GV.

## **Acknowledgements**

VK would like to thank Bangjie Wang for help in using image recognition software, and Dr Sarah Aliko for help with neuroimaging analysis.

## References

- Aliko, S., Huang, J., Gheorghiu, F., Meliss, S., & Skipper, J. I. (2020). A naturalistic neuroimaging database for understanding the brain using ecological stimuli. *Sci Data*, 7(1), 347. <https://doi.org/10.1038/s41597-020-00680-2>
- J.R. Barclay, John D. Bransford, Jeffery J. Franks, Nancy S. McCarrell, Kathy Nitsch, Comprehension and semantic flexibility, *Journal of Verbal Learning and Verbal Behaviour*, Volume 13, Issue 4, 1974, Pages 471-481, ISSN 0022-5371, [https://doi.org/10.1016/S0022-5371\(74\)80024-1](https://doi.org/10.1016/S0022-5371(74)80024-1).
- Barsalou, L. W. (1982). Context-independent and context-dependent information in concepts. *Memory & Cognition*, 10(1), 82–93. <https://doi.org/10.3758/BF03197629>
- Barsalou, L. W. (1987). The instability of graded structure: Implications for the nature of concepts. In U. Neisser (Ed.), *Concepts and conceptual development: Ecological and intellectual factors in categorization* (pp. 101–140). Cambridge University Press.
- Barsalou, L. W., Dutriaux, L., & Scheepers, C. (2018). Moving beyond the distinction between concrete and abstract concepts. *Philos Trans R Soc Lond B Biol Sci*, 373(1752). <https://doi.org/10.1098/rstb.2017.0144>
- Barsalou, L. W., Simmons, W. K., Barbey, A. K., & Wilson, C. D. (2003). Grounding Conceptual Knowledge in Modality Specific Systems. *Trends in Cognitive Sciences*, 7(7), 7.

- Barsalou, L. W., & Wiemer-Hastings, K. (2005). Situating Abstract Concepts. In *Grounding Cognition* (pp. 129-163). <https://doi.org/10.1017/cbo9780511499968.007>
- Bedny, M., & Thompson-Schill, S. L. (2006). Neuroanatomically separable effects of imageability and grammatical class during single-word comprehension. *Brain Lang*, 98(2), 127-139. <https://doi.org/10.1016/j.bandl.2006.04.008>
- Binder, J.R., C. F. W., K. A. McKiernan, E. T. Possing and D.A. Medler (2005). Distinct Brain Systems for Processing Concrete and Abstract Concepts. *Journal of Cognitive Neuroscience*, 17(6), 12.
- Binder, J. R., Desai, R. H., Graves, W. W., & Conant, L. L. (2009). Where is the semantic system? A critical review and meta-analysis of 120 functional neuroimaging studies. *Cereb Cortex*, 19(12), 2767-2796. <https://doi.org/10.1093/cercor/bhp055>
- Bloom, P. (2000). *How children learn the meanings of words*. The MIT Press.
- Borghi, A. M., & Zarcone, E. (2016). Grounding abstractness: Abstract concepts and the activation of the mouth. *Frontiers in Psychology*, 7, Article 1498.
- Brysbaert, M., Warriner, A. B., & Kuperman, V. (2014). Concreteness ratings for 40 thousand generally known English word lemmas. *Behav Res Methods*, 46(3), 904-911. <https://doi.org/10.3758/s13428-013-0403-5>
- Cai, Z., & Vigliocco, G. (2018). Word Processing. *Language and Thought*, 3.
- Caucheteux, C., & King, J. R. (2022). Brains and algorithms partially converge in natural language processing. *Commun Biol*, 5(1), 134. <https://doi.org/10.1038/s42003-022-03036-1>

- Chambers, C. G., Tanenhaus, M. K., & Magnuson, J. S. (2004). Actions and affordances in syntactic ambiguity resolution. *J Exp Psychol Learn Mem Cogn*, 30(3), 687-696. <https://doi.org/10.1037/0278-7393.30.3.687>
- Chen, G., Z. S. Saad, J. C. Britton, D. S. Pine, and R. W. Cox. Linear mixed-effects modeling approach to fmri group analysis. *Neuroimage*, 73:176–90, 2013. ISSN 1095-9572. 1053-8119. 1053-8119. URL <https://www.ncbi.nlm.nih.gov/pubmed/23376789>.
- Chen, G., Saad, Z. S., Adleman, N. E., Leibenluft, E., & Cox, R. W. (2015). Detecting the subtle shape differences in hemodynamic responses at the group level. *Front Neurosci*, 9, 375. <https://doi.org/10.3389/fnins.2015.00375>
- Conca, F., Borsa, V. M., Cappa, S. F., & Catricala, E. (2021). The multidimensionality of abstract concepts: A systematic review. *Neurosci Biobehav Rev*, 127, 474-491. <https://doi.org/10.1016/j.neubiorev.2021.05.004>
- Conca, F., Catricala, E., Canini, M., Petrini, A., Vigliocco, G., Cappa, S. F., & Della Rosa, P. A. (2021). In search of different categories of abstract concepts: a fMRI adaptation study. *Sci Rep*, 11(1), 22587. <https://doi.org/10.1038/s41598-021-02013-8>
- Cooper, R. M. (1974). The Control of Eye Fixation by the Meaning of Spoken Language. *Cognitive Psychology*, 6, 23.
- Cox, R. W. (1995). AFNI: Software for Analysis and Visualization of Functional Magnetic Resonance Neuroimages. *Computers and Biomedical Research*, 29(14), 11.
- Cox, R. W. (1997). Software tools for analysis and visualization of fMRI data. *Nmr in Biomedicine*, 10, 7.



Deniz, F., Tseng, C., Wehbe, L., Dupré La Tour, T., Gallant, J. L. Semantic Representations During Language Comprehension are Affected by Context.

Del Maschio N, Fedeli D, Garofalo G, Buccino G. Evidence for the Concreteness of Abstract Language: A Meta-Analysis of Neuroimaging Studies. *Brain Sciences*. 2022; 12(1):32. <https://doi.org/10.3390/brainsci12010032>

Devlin, J., Chang, M. W., Lee, K., & Toutanova, K. (2018). BERT: Pre-training of Deep Bidirectional Transformers for Language Understanding. *Proceedings of the 2019 Conference of the North American Chapter of the Association for Computational Linguistics: Human Language Technologies, I*. <https://doi.org/10.18653/v1/N19-1423>

Driess, D., Xia, F., Sajjadi, M.S., Lynch, C., Chowdhery, A., Ichter, B., Wahid, A., Tompson, J., Vuong, Q.H., Yu, T., Huang, W., Chebotar, Y., Sermanet, P., Duckworth, D., Levine, S., Vanhoucke, V., Hausman, K., Toussaint, M., Greff, K., Zeng, A., Mordatch, I., & Florence, P.R. (2023). PaLM-E: An Embodied Multimodal Language Model. *ArXiv, abs/2303.03378*.

Duan, H., Zhao, Y., Xiong, Y., Liu, W., & Lin, D. (2020). Omni-source Webly-supervised Learning for Video Recognition. *Bioarchive (Tech Report)*. <https://doi.org/arXiv:2003.13042>

Eberhard, K. M., Spivey-Knowlton, M. J., Sedivy, J. C., & Tanenhaus, M. K. Eye Movements as a Window into Real-Time Spoken Language Comprehension in Natural Contexts.

Fauconnier, G., & Turner, M. (2002). *The way we think: Conceptual blending and the mind's hidden complexities*. Basic Books.

- Fedorenko, E., Behr, M. K., & Kanwisher, N. (2011). Functional specificity for high-level linguistic processing in the human brain. *Proc Natl Acad Sci U S A*, *108*(39), 16428-16433. <https://doi.org/10.1073/pnas.1112937108>
- Gao, C., Baucom, L. B., Kim, J., Wang, J., Wedell, D. H., & Shinkareva, S. V. (2019). Distinguishing abstract from concrete concepts in supramodal brain regions. *Neuropsychologia*, *102*-110. <https://doi.org/10.1016/j.neuropsychologia.2019.05.032>
- Geschwind, N. (1970). The Organization of Language in the Brain. *Science*, *170*, 5.
- Goldberg, R. F., Perfetti, C. A., & Schneider, W. (2006). Perceptual knowledge retrieval activates sensory brain regions. *J Neurosci*, *26*(18), 4917-4921. <https://doi.org/10.1523/JNEUROSCI.5389-05.2006>
- Goldstein, A., Zada, Z., Buchnik, E., Schain, M., Price, A., Aubrey, B., Nastase, S. A., Feder, A., Emanuel, D., Cohen, A., Jansen, A., Gazula, H., Choe, G., Rao, A., Kim, C., Casto, C., Fanda, L., Doyle, W., Friedman, D., Dugan, P., Melloni, L., Reichart, R., Devore, S., Flinker, A., Hasenfratz, L., Levy, O., Hassidim, A., Brenner, M., Matias, Y., Norman, K. A., Devinsky, O., & Hasson, U. (2022). Shared computational principles for language processing in humans and deep language models. *Nat Neurosci*, *25*(3), 369-380. <https://doi.org/10.1038/s41593-022-01026-4>
- Harpaintner, M., Trumpp, N. M., & Kiefer, M. (2018). The Semantic Content of Abstract Concepts: A Property Listing Study of 296 Abstract Words. *Front Psychol*, *9*, 1748. <https://doi.org/10.3389/fpsyg.2018.01748>
- Harpaintner, M., Sim, E. J., Trumpp, N. M., Ulrich, M., & Kiefer, M. (2020). The grounding of abstract concepts in the motor and visual system: An fMRI study. *Cortex*, *124*, 1-22. <https://doi.org/10.1016/j.cortex.2019.10.014>

- Harpaintner, M., Trumpp, N. M., & Kiefer, M. (2022). Time course of brain activity during the processing of motor- and vision-related abstract concepts: flexibility and task dependency. *Psychological Research*, 86(8), 2560-2582. <https://doi.org/10.1007/s00426-020-01374-5>
- Hasson, U., Nir, Y., Levy, I., Fuhrmann, G., & Malach, R. (2004). Intersubject Synchronization of Cortical Activity During Natural Vision. *Science*, 303(5664), 6.
- Hasson, U., Skipper, J. I., Wilde, M. J., Nusbaum, H. C., & Small, S. L. (2008). Improving the analysis, storage and sharing of neuroimaging data using relational databases and distributed computing. *NeuroImage*, 39(2), 693–706.
- Hauk, O., & Pulvermüller, F. (2004). Somatotopic Representation of Action Words in Human Motor and Premotor Cortex. [https://doi.org/10.1016/s0896-6273\(03\)00838-9](https://doi.org/10.1016/s0896-6273(03)00838-9)
- He, K., Zhang, Y., Ren, S., & Sun, J. (2015). Deep Residual Learning for Image Recognition. *Bioarchive (Tech Report)*. <https://doi.org/https://doi.org/10.48550/arXiv.1512.03385>
- Hickok, G. (2022). The dual stream model of speech and language processing. *Handb Clin Neurol*, 185, 57-69. <https://doi.org/10.1016/B978-0-12-823384-9.00003-7>
- Hoffman, P., Lambon Ralph, M. A., & Rogers, T. T. (2013). Semantic diversity: a measure of semantic ambiguity based on variability in the contextual usage of words. *Behav Res Methods*, 45(3), 718-730. <https://doi.org/10.3758/s13428-012-0278-x>
- Hoenig, K., Sim, E.-J., Bochev, V., Herrnberger, B., & Kiefer, M. (2008). Conceptual flexibility in the human brain: Dynamic recruitment of semantic maps from visual, motion and motor-related areas. *Journal of Cognitive Neuroscience*, 20(10).

- Hsu, N. S., J.M., D., M. Kraemer, Robyn, Oliver, T., & Schlichting, M. L. T.-S., S. (2011). Color, Context, and Cognitive Style: Variations in Color Knowledge Retrieval as a Function of Task and Subject Variables. *Journal of Cognitive Neuroscience*, 23(9), 13.
- Jackendoff, Ray, *Foundations of Language: Brain, Meaning, Grammar, Evolution* (Oxford, 2002; online edn, Oxford Academic, 1 Sept. 2007), <https://doi.org/10.1093/acprof:oso/9780198270126.001.0001>
- Jackson., R. L., The neural correlates of semantic control revisited. *Neuroimage*, 224:117444, 2021. ISSN 1095-9572. URL <https://www.ncbi.nlm.nih.gov/pubmed/33059049>.
- Jones, M. N. B. T. Johns, and G. Recchia. The role of semantic diversity in lexical organization. 891 *Can J Exp Psychol*, 66(2):115–24, 2012. ISSN 1878-7290. URL <https://www.ncbi.nlm.nih.gov/pubmed/22686160.893>
- Kalenine, S., Shapiro, A. D., Flumini, A., Borghi, A. M., & Buxbaum, L. J. (2014). Visual context modulates potentiation of grasp types during semantic object categorization. *Psychon Bull Rev*, 21(3), 645-651. <https://doi.org/10.3758/s13423-013-0536-7>
- Kiefer, M., & Pulvermüller, F. (2012). Conceptual representations in mind and brain: theoretical developments, current evidence and future directions. *Cortex*, 48(7), 805-825. <https://doi.org/10.1016/j.cortex.2011.04.006>
- Kiefer, M., Sim, E. J., Herrnberger, B., Grothe, J., & Hoenig, K. (2008). The sound of concepts: four markers for a link between auditory and conceptual brain systems. *J Neurosci*, 28(47), 12224-12230. <https://doi.org/10.1523/JNEUROSCI.3579-08.2008>
- Kiefer, M., Pielke, L., & Trumpp, N. M. (2022). Differential temporo-spatial pattern of electrical brain activity during the processing of abstract concepts related to mental

states and verbal associations. *NeuroImage*, 252, 119036.

<https://doi.org/10.1016/j.neuroimage.2022.119036>

Kiehl, K.A., Liddle, P.F., Smith, A.M., Mendrek, A., Forster and, B.B. and Hare, R.D. (1999),  
Neural pathways involved in the processing of concrete and abstract words. *Hum.  
Brain Mapp.*, 7: 225-233.  
[https://doi.org/10.1002/\(SICI\)1097-0193\(1999\)7:4<225::AID-HBM1>3.0.CO;2-P](https://doi.org/10.1002/(SICI)1097-0193(1999)7:4<225::AID-HBM1>3.0.CO;2-P)

Kroll, J. F., & Merves, J. S. (1986). Lexical access for concrete and abstract words. *Journal of  
Experimental Psychology: Learning, Memory, and Cognition*, 12(1), 92–107.  
<https://doi.org/10.1037/0278-7393.12.1.92>

Kutas M, Federmeier KD. Thirty years and counting: finding meaning in the N400  
component of the event-related brain potential (ERP). *Annu Rev Psychol.*  
2011;62:621-47. doi: 10.1146/annurev.psych.093008.131123. PMID: 20809790;  
PMCID: PMC4052444.

Lebois, L. A., Wilson-Mendenhall, C. D., & Barsalou, L. W. (2015). Are Automatic  
Conceptual Cores the Gold Standard of Semantic Processing? The  
Context-Dependence of Spatial Meaning in Grounded Congruency Effects. *Cogn Sci*,  
39(8), 1764-1801. <https://doi.org/10.1111/cogs.12174>

Lu, H., Zhou, Q., Fei, N., Lu, Z., M., D., Wen, J., Du, C., Zhao, X., Sun, H., He, H., & Wen,  
J. R. (2022). Multimodal foundation models are better simulators of the human brain.  
*arXivLabs (preprint)*. <https://doi.org/10.48550/arXiv.2208.08263>

Lynott, D., Connell, L., Brysbaert, M., Brand, J., & Carney, J. (2020). The Lancaster  
Sensorimotor Norms: multidimensional measures of perceptual and action strength

- for 40,000 English words. *Behav Res Methods*, 52(3), 1271-1291.  
<https://doi.org/10.3758/s13428-019-01316-z>
- Mellet, E., Tzourio, N., Mazoyer, B. (1998). Cortical anatomy of mental imagery of concrete nouns based on their dictionary definition. *NeuroReport*, 9(5), 5.
- Meteyard, L., Cuadrado, S.R., Bahrami, B., & Vigliocco, G. (2012). Coming of age: A review of embodiment and the neuroscience of semantics. *Cortex*, 48, 788-804.
- Mkrtychian, N., Blagovechtchenski, E., Kurmakaeva, D., Gnedykh, D., Kostromina, S., & Shtyrov, Y. (2019). Concrete vs. Abstract Semantics: From Mental Representations to Functional Brain Mapping. *Front Hum Neurosci*, 13, 267.  
<https://doi.org/10.3389/fnhum.2019.00267>
- Muraki, E. J., Cortese, F., Protzner, A. B., & Pexman, P. M. (2020). Heterogeneity in abstract verbs: An ERP study. *Brain and Language*, 211, 104863.  
<https://doi.org/10.1016/j.bandl.2020.104863>
- Muraki, E. J., Sidhu, D. M., & Pexman, P. M. (2020). Heterogenous abstract concepts: Is 'ponder' different from 'dissolve'? *Psychological Research*, 86(8), 2478-2494.  
<https://doi.org/10.1007/s00426-020-01398-x>
- Noppeney, U., Phillips, J., & Price, C. (2004). The neural areas that control the retrieval and selection of semantics. *Neuropsychologia*, 42(9), 1269-1280.  
<https://doi.org/10.1016/j.neuropsychologia.2003.12.014>
- Oosterwijk, S., Mackey, S., Wilson-Mendenhall, C., Winkielman, P., & Paulus, M. P. (2015). Concepts in context: Processing mental state concepts with internal or external focus involves different neural systems. *Soc Neurosci*, 10(3), 294-307.  
<https://doi.org/10.1080/17470919.2014.998840>

- Pennington, J., Socher, R., & Manning, C. D. (2014). GloVe: Global Vectors for Word Representation. *Proceedings of the 2014 Conference on Empirical Methods in Natural Language Processing*, 11. <https://doi.org/10.3115/v1/D14-1162>
- Pexman, P. M., Heard, A., Lloyd, E., & Yap, M. J. (2017). The Calgary semantic decision project: concrete/abstract decision data for 10,000 English words. *Behav Res Methods*, 49(2), 407-417. <https://doi.org/10.3758/s13428-016-0720-6>
- Piantadosi, S., T., & Hill, F. (2022). Meaning Without Reference in Large Language Models. *Archive (preprint)*. <https://doi.org/https://doi.org/10.48550/arXiv.2208.02957>
- Popp, M., Trumpp, N. M., & Kiefer, M. (2019). Processing of action and sound verbs in context: An fMRI study. *Translational Neuroscience*, 10, 200-222. <https://doi.org/10.1515/tnsci-2019-0035>
- Pulvermuller, F. (2005). Brain mechanisms linking language and action. *Nature Reviews Neuroscience*, 6, 6.
- Pulvermüller, F. (2018). Neurobiological mechanisms for semantic feature extraction and conceptual flexibility. *Topics in Cognitive Science*, 10(3), 590-620. <https://doi.org/10.1111/tops.12367>
- Pulvermuller, F. (2018). Neural reuse of action perception circuits for language, concepts and communication. *Prog Neurobiol*, 160, 1-44. <https://doi.org/10.1016/j.pneurobio.2017.07.001>
- Pulvermuller, F., & Fadiga, L. (2010). Active perception: sensorimotor circuits as a cortical basis for language. *Nat Rev Neurosci*, 11(5), 351-360. <https://doi.org/10.1038/nrn2811>

- Reinboth, T., & Farkaš, I. (2022). Ultimate Grounding of Abstract Concepts: A Graded Account. *Journal of Cognition*, 5(1). <https://doi.org/10.5334/joc.214>
- Roversi, C., Borghi, A. M., & Tummolini, L. (2013). A marriage is an artefact and not a walk that we take together: An experimental study on the categorization of artefacts. *Review of Philosophy and Psychology*, 4(3), 527-542. <https://doi.org/10.1007/s13164-013-0150-7>
- Sabsevitz, D. S., Medler, D. A., Seidenberg, M., & Binder, J. R. (2005). Modulation of the semantic system by word imageability. *Neuroimage*, 27(1), 188-200. <https://doi.org/10.1016/j.neuroimage.2005.04.012>
- Simmons, W. K., Ramjee, V., Beauchamp, M. S., McRae, K., Martin, A., & Barsalou, L. W. (2007). A common neural substrate for perceiving and knowing about color. *Neuropsychologia*, 45(12), 2802-2810. <https://doi.org/10.1016/j.neuropsychologia.2007.05.002>
- Skipper, J. I., Aliko, S., Brown, S., Jo, Y. J., Lo, S., Molimpakis, E., & Lametti, D. R. (2022). Reorganization of the Neurobiology of Language After Sentence Overlearning. *Cereb Cortex*, 32(11), 2447-2468. <https://doi.org/10.1093/cercor/bhab354>
- Skipper, J. I., Goldin-Meadow, S., Nusbaum, H. C., & Small, S. L. (2009). Gestures orchestrate brain networks for language understanding. *Curr Biol*, 19(8), 661-667. <https://doi.org/10.1016/j.cub.2009.02.051>
- Skipper, J. I., & Willems, R. M. (2015). The NOLB model: a model of the natural organization of language and the brain. In *Cognitive Neuroscience of Natural Language Use* (pp. 101-134). <https://doi.org/10.1017/cbo9781107323667.006>



Tanenhaus, M. K., M. J. Spivey-Knowlton, K. M. Eberhard, and J. C. edivy. Integration of visual and linguistic information in spoken language comprehension. *Science*, 268, 1995.

Tang, J. Amanda LeBel, Shailee Jain, and Alexander G. Huth. Semantic reconstruction 1103 of continuous language from non-1 invasive brain recordings. *Bioarchive*, 2022.

Thompson-Schill, S. L., D'Esposito, M., & Kan, I. P. (1999). Effects of repetition and competition on activity in left prefrontal cortex during word generation. *Neuron*, 23, 513-522

Van Dam, W. O., van Dijk, M., Bekkering, H., & Rueschemeyer, S. A. (2012). Flexibility in embodied lexical-semantic representations. *Human Brain Mapping*, 33(10), 2322-2333. <https://doi.org/10.1002/hbm.21365>)

Vaswani, A., Shazeer, A., Parmar, N., Uszkoreit, J., Jones, L., Gomez, A., Kaiser, L., & Polosukhin, I. (2017). Attention is All You Need. *arXivLabs (preprint)*. <https://doi.org/https://doi.org/10.48550/arXiv.1706.03762>

Vigliocco, G. J. Warren, S. Siri, J. Arciuli, S. Scott, and R. Wise. The role of semantics and 866 grammatical class in the neural representation of words. *Cereb Cortex*, 16(12):1790–6, 2006.867 ISSN 1047-3211 (Print) 1047-3211

Vigliocco, G., Meteyard, L., Andrews, M., & Kousta, S. (2009). Toward a theory of semantic representation. *Language and Cognition*, 1(2), 219-247. doi:10.1515/LANGCOG.2009.011

- Vigliocco, G., Kousta, S. T., Della Rosa, P. A., Vinson, D. P., Tettamanti, M., Devlin, J. T., & Cappa, S. F. (2014). The neural representation of abstract words: the role of emotion. *Cereb Cortex*, 24(7), 1767-1777. <https://doi.org/10.1093/cercor/bht025>
- Villani, C., Lugli, L., Liuzza, M. T., & Borghi, A. M. (2019). Varieties of abstract concepts and their multiple dimensions. *Language and Cognition*, 11(3), 403-430. <https://doi.org/10.1017/langcog.2019.23>
- Villani, C., Lugli, L., Liuzza, M. T., Nicoletti, R., & Borghi, A. M. (2021). Sensorimotor and interoceptive dimensions in concrete and abstract concepts. *J Mem Lang*, 116, 104173. <https://doi.org/10.1016/j.jml.2020.104173>
- Wagner, A. D., Paré-Blagoev, E. J., Clark, J., & Poldrack, R. A. (2001). Recovering meaning: Left prefrontal cortex guides controlled semantic retrieval. *Neuron*, 31, 329-338
- Wang, J., Conder, J. A., Blitzer, D. N., & Shinkareva, S. V. (2010). Neural representation of abstract and concrete concepts: a meta-analysis of neuroimaging studies. *Hum Brain Mapp*, 31(10), 1459-1468. <https://doi.org/10.1002/hbm.20950>
- Warriner, A. B., Kuperman, V., & Brysbaert, M. (2013). Norms of valence, arousal, and dominance for 13,915 English lemmas. *Behav Res Methods*, 45(4), 1191-1207. <https://doi.org/10.3758/s13428-012-0314-x>
- Whitney, C., M. Kirk, J. O'Sullivan, M. A. Lambon Ralph, and E. Jefferies. The neural organization of semantic control: Tms evidence for a distributed network in left inferior frontal and posterior middle temporal gyrus. *Cereb Cortex*, 21(5):1066-75, 2011. URL <https://www.ncbi.nlm.nih.gov/pubmed/20851853>.

Wiemer-Hastings, K. and Xu, X. (2005), Content Differences for Abstract and Concrete Concepts. *Cognitive Science*, 29: 719-736.

[https://doi.org/10.1207/s15516709cog0000\\_33](https://doi.org/10.1207/s15516709cog0000_33)

Willems, R. M., Hagoort, P., & Casasanto, D. (2010). Body-specific representations of action verbs: neural evidence from right- and left-handers. *Psychol Sci*, 21(1), 67-74.

<https://doi.org/10.1177/0956797609354072>

Yee, E., & Thompson-Schill, S. L. (2016). Putting concepts into context. *Psychon Bull Rev*, 23(4), 1015-1027. <https://doi.org/10.3758/s13423-015-0948-7>

Yeshurun, Y., Nguyen, M., & Hasson, U. (2021). The default mode network: where the idiosyncratic self meets the shared social world. *Nat Rev Neurosci*, 22(3), 181-192.

<https://doi.org/10.1038/s41583-020-00420-w>

Zdrzilova, L., Sidhu, D. M., & Pexman, P. M. (2018). Communicating abstract meaning: Concepts revealed in words and gestures. *Philosophical transactions of the Royal Society of London. Series B, Biological sciences*, 373(1752).

<https://doi.org/10.1098/rstb.2017.0138>

## Supplementary Material

---

### Complete Results for Meta-Analysis & Peak and Valley Analysis

| Dimension         | Abstract Clusters<br>(N=35) | Concrete Clusters<br>(N=20) | Kruskal-Wallis Test   |
|-------------------|-----------------------------|-----------------------------|-----------------------|
| Autob. Memory     | 9                           | 1                           | H(2) = 4, p = 0.05    |
| Valence           | 8                           | 0                           | H(2) = 5.6, p = .01   |
| Theory of Mind    | 6                           | 0                           | H(2) = 4.8, p = 0.03  |
| Nausea            | 6                           | 0                           | H(2) = 4.8, p = 0.03  |
| Pain              | 5                           | 0                           | H(2) = 4, p = 0.05    |
| Movement          | 2                           | 11                          | H(2) = 12.4, p < .001 |
| Social/Empathy    | 4                           | 1                           | H(2) = 0.7, p = 0.42  |
| Touch             | 3                           | 0                           | H(2) = 1.8, p = 0.18  |
| Speech            | 5                           | 6                           | H(2) = 1.1, p = 0.29  |
| Language          | 8                           | 4                           | H(2) = 0.08, p = 0.78 |
| Reading           | 3                           | 0                           | H(2) = 1.8, p = 0.18  |
| Reward/Motivation | 7                           | 3                           | H(2) = 0.24, p = 0.63 |
| Vision            | 0                           | 3                           | H(2) = 5.3, p = 0.02  |
| Listening         | 3                           | 2                           | H(2) = 0.02, p = 0.88 |
| Planning          | 1                           | 0                           | H(2) = 1.7, p = 0.19  |
| Calculation       | 1                           | 0                           | H(2) = 1.7, p = 0.19  |
| Touch             | 3                           | 0                           | H(2) = 5.3, p = 0.02  |

**Table S1.** Meta analytic description of concrete and abstract activation clusters.

| <b>Dimension</b> | <b>Abstract Clusters<br/>(N=35)</b> | <b>Concrete Clusters<br/>(N=20)</b> | <b>Kruskal-Wallis Test</b> |
|------------------|-------------------------------------|-------------------------------------|----------------------------|
| Valence          | 9                                   | 1                                   | H(2) = 4, p = 0.05         |
| Interoceptive    | 8                                   | 0                                   | H(2) = 5.6, p = .01        |
| Arousal          | 6                                   | 0                                   | H(2) = 4.8, p = 0.03       |
| Auditory         | 6                                   | 0                                   | H(2) = 4.8, p = 0.03       |
| Visual           | 5                                   | 0                                   | H(2) = 4, p = 0.05         |
| Head             | 2                                   | 11                                  | H(2) = 12.4, p < .001      |
| Haptic           | 0                                   | 3                                   | H(2) = 5.3, p = 0.02       |
| Foot_Leg         | 0                                   | 2                                   | H(2) = 3.5, p = 0.06       |
| Hand_Arm         | 0                                   | 1                                   | H(2) = 1.7, p = 0.19       |
| Torso            | 0                                   | 4                                   | H(2) = 7.3, p = 0.01       |
| Gustatory        | 0                                   | 2                                   | H(2) = 3.5, p = 0.06       |
| Mouth            | 0                                   | 3                                   | H(2) = 5.3, p = 0.02       |
| Head             | 0                                   | 0                                   | /                          |

**Table S2.** Peak and Valley between concrete and abstract activation clusters.

## Peak and Valley Analysis at different lags

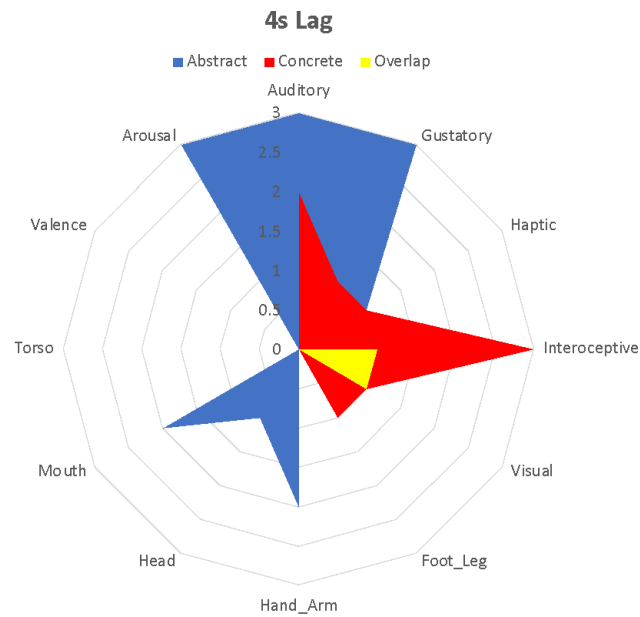

**Figure S1.** Peak and Valley Analysis for a 4s lag. A Kruskal-Wallis test shows that the distribution between sensorimotor and interoceptive/emotional dimensions for concrete and abstract words is significantly different to a 5s ( $H(2)=4.8$ ,  $p=0.03$ ) and 6s ( $H(2)=5.3$ ,  $p=0.02$ ) lag.

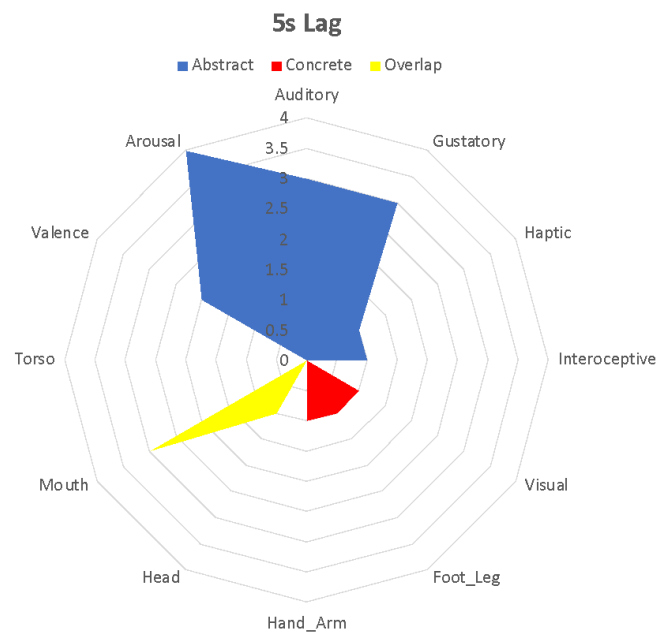

**Figure S2.** Peak and Valley Analysis for a 5s lag. Internal dimensions Valence and Arousal are significantly more associated with peaks in abstract compared to concrete clusters (Valence:  $H(2) = 5.8$ ,  $p=.02$ ; Arousal:  $H(2) = 6.7$ ,  $p = .01$ ). Conversely, concrete clusters are more associated with sensorimotor dimensions (Hand\_Arm, Foot\_Leg and Visual) – though not significantly so. Overlap is significantly more associated with “Mouth” ( $H(2) = 6.2$ ,  $p=0.2$ ).

## Context Analysis

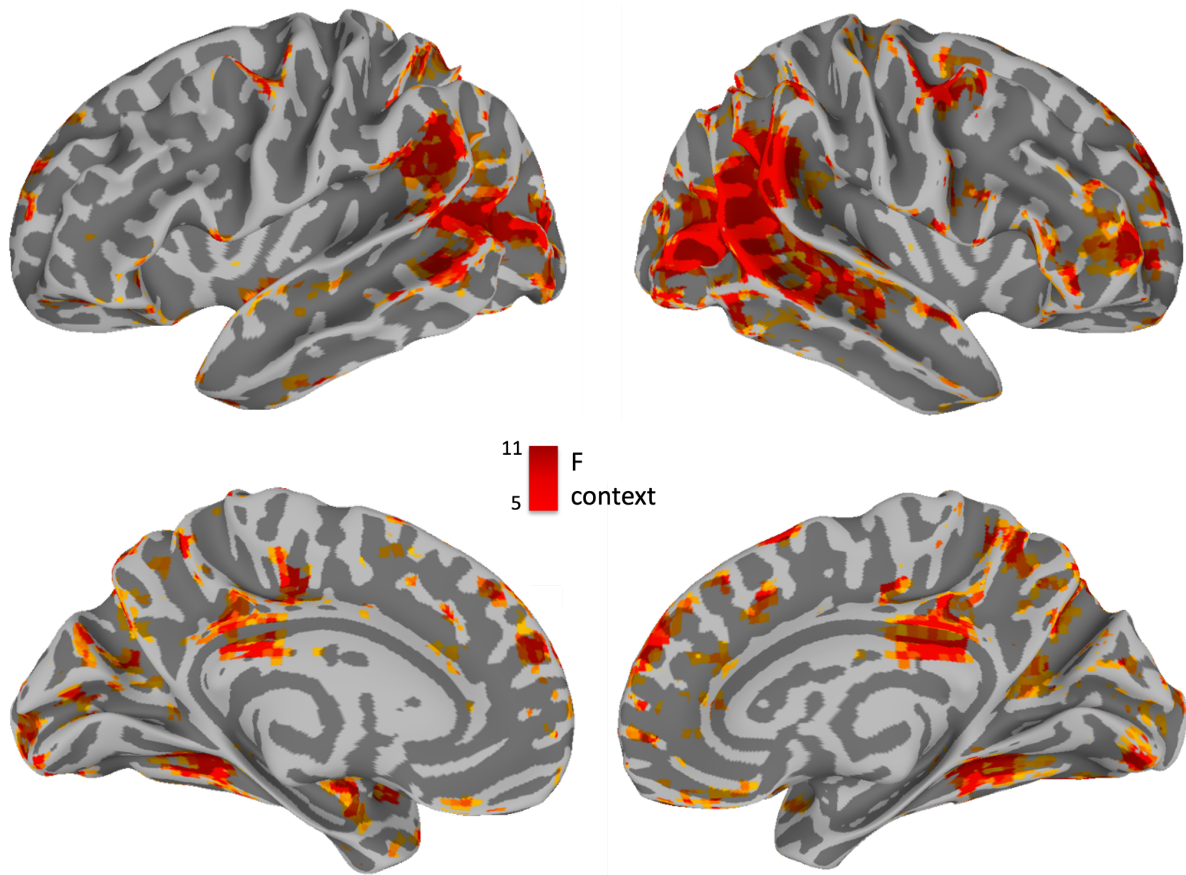

**Figure S3.** Main effect of context. Most significantly modulated areas include the intersection between posterior temporal and occipital lobe, the Precuneus, Middle Prefrontal Cortex, as well as Angular Gyrus, and right inferior frontal gyrus. Results are thresholded and corrected for multiple comparisons at  $\alpha = 0.01$  and displayed with a cluster-size  $\geq 20$  voxels.

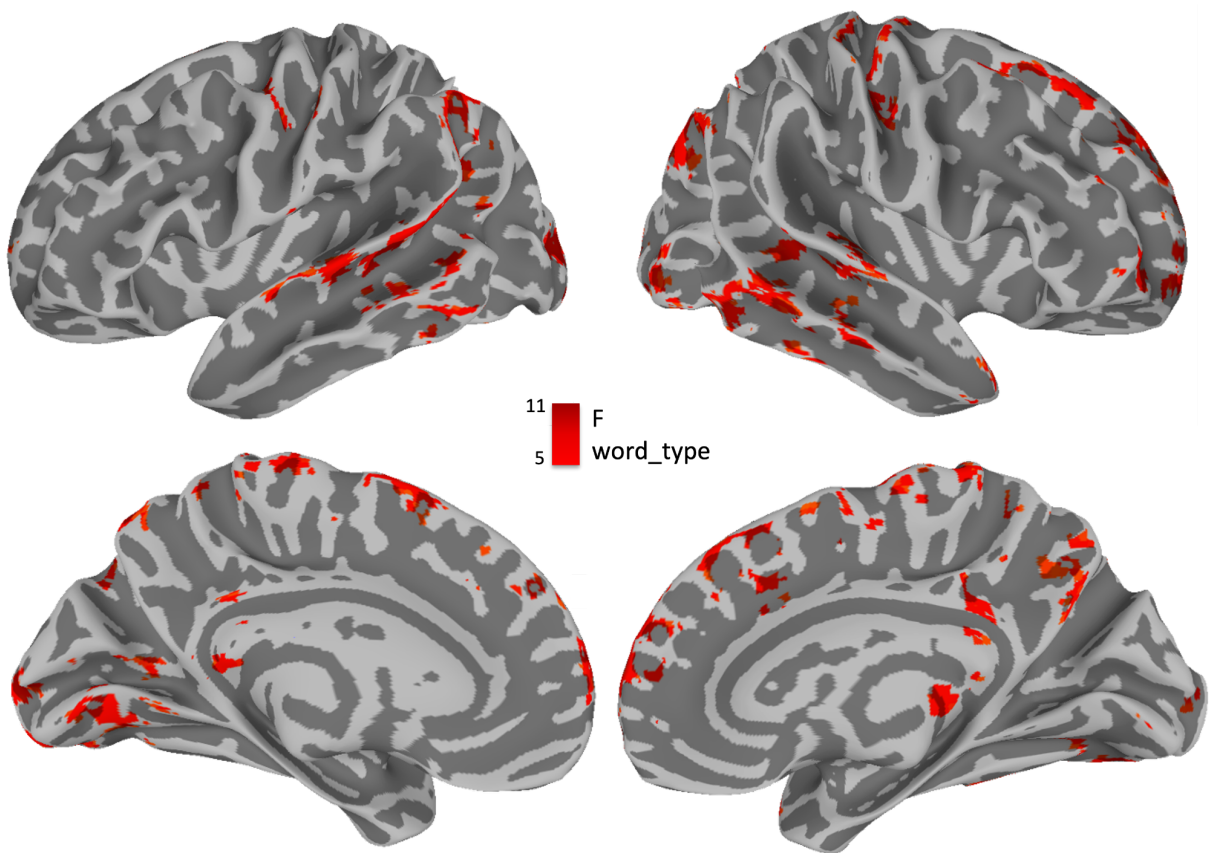

**Figure S4.** Main effect of word\_type. Most significantly modulated areas include superior temporal sulcus, superior temporal gyrus and middle temporal gyrus (bilateral), angular gyrus (bilateral), the central sulcus and precentral and postcentral gyrus (right hemisphere), as well as lateral and medial frontal cortices and the occipital lobe. Results are thresholded and corrected for multiple comparisons at  $\alpha = 0.01$  and displayed with a cluster-size  $\geq 20$  voxels.



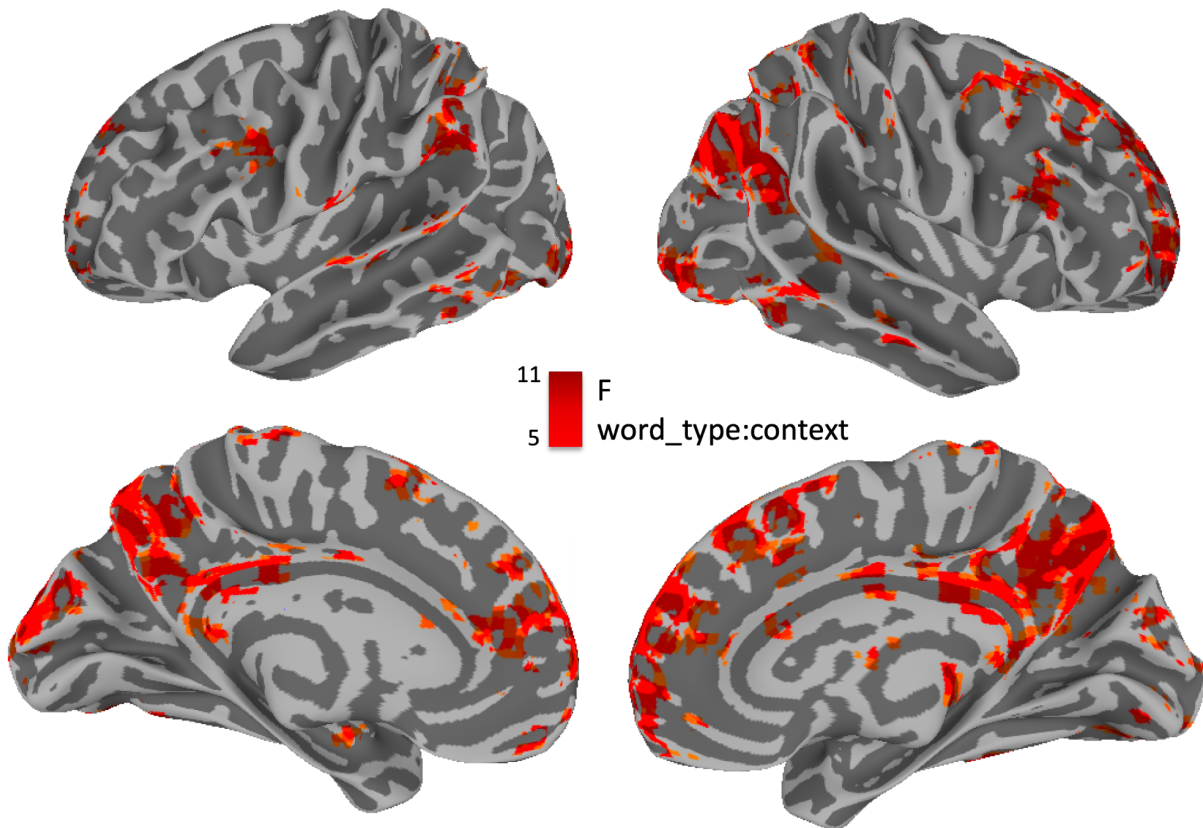

**Figure S5.** Interaction between context (high/low) and word type (abstract/concrete). Most significantly modulated areas include the Precuneus, Middle Prefrontal Cortex as well as Middle Frontal Gyrus, Angular Gyrus and Posterior Cingulate Cortex. These correspond to the nodes of the default mode network, which was confirmed by using the neurosynth decoder on the unthresholded brain image. The top 3 keywords were: “default”; “default mode” and “dmn”. Displayed results are thresholded and corrected for multiple comparisons at  $\alpha = 0.01$  and displayed with a cluster-size  $\geq 20$  voxels.

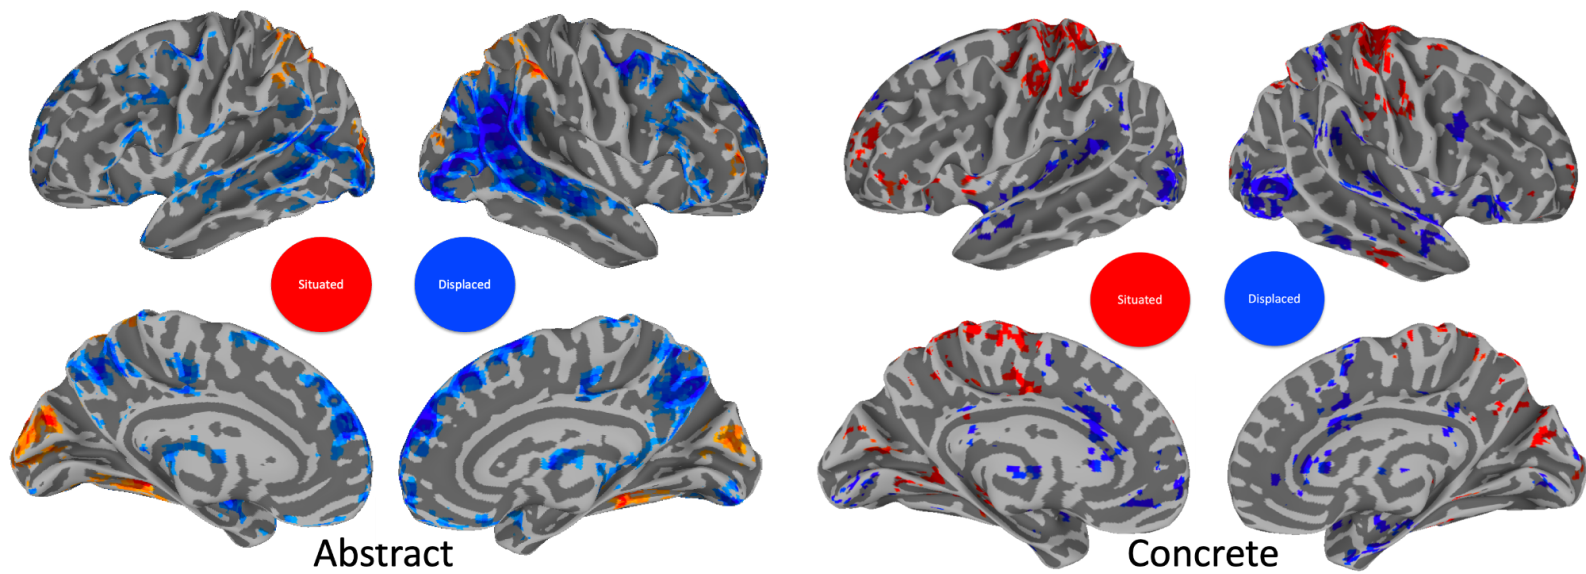

**Figure S6.** Interaction between context and word type broken up. Nodes of the DMN are especially active in the displaced condition for both abstract and concrete words. Visual and sensorimotor areas are especially active in situating conditions for both abstract and concrete words. Results are thresholded and corrected for multiple comparisons at  $\alpha = 0.01$  and displayed with a cluster-size  $\geq 20$  voxels

---

### Comparison between Overlap and “Language Network”

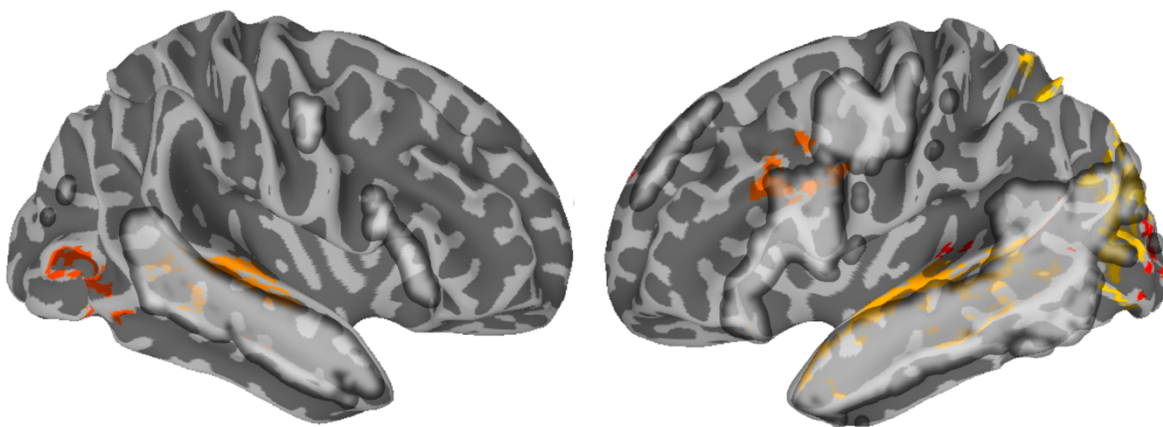

**Figure S7.** Comparison between the language network (outline) and overlap activity for both concrete and abstract words across context. Results are thresholded and corrected for multiple comparisons at  $\alpha = 0.01$  and displayed with a cluster-size  $\geq 20$  voxels

---

## Code

We implemented our data analysis in Bash, Python and R. Our code will be provided as online supplemental material upon publication and hosted openly on a dedicated Github repository.
